# Supplementary material for: Gene Size Matters: An Analysis of Gene Length in the Human Genome
Source: PubMed Central journal article supplement (PMC7905317; doi:10.3389/fgene.2021.559998), 2021-02-11
Supplement: Data_Sheet_3.pdf [file Data_Sheet_3.pdf]

Cellular Component terms for the longest genes

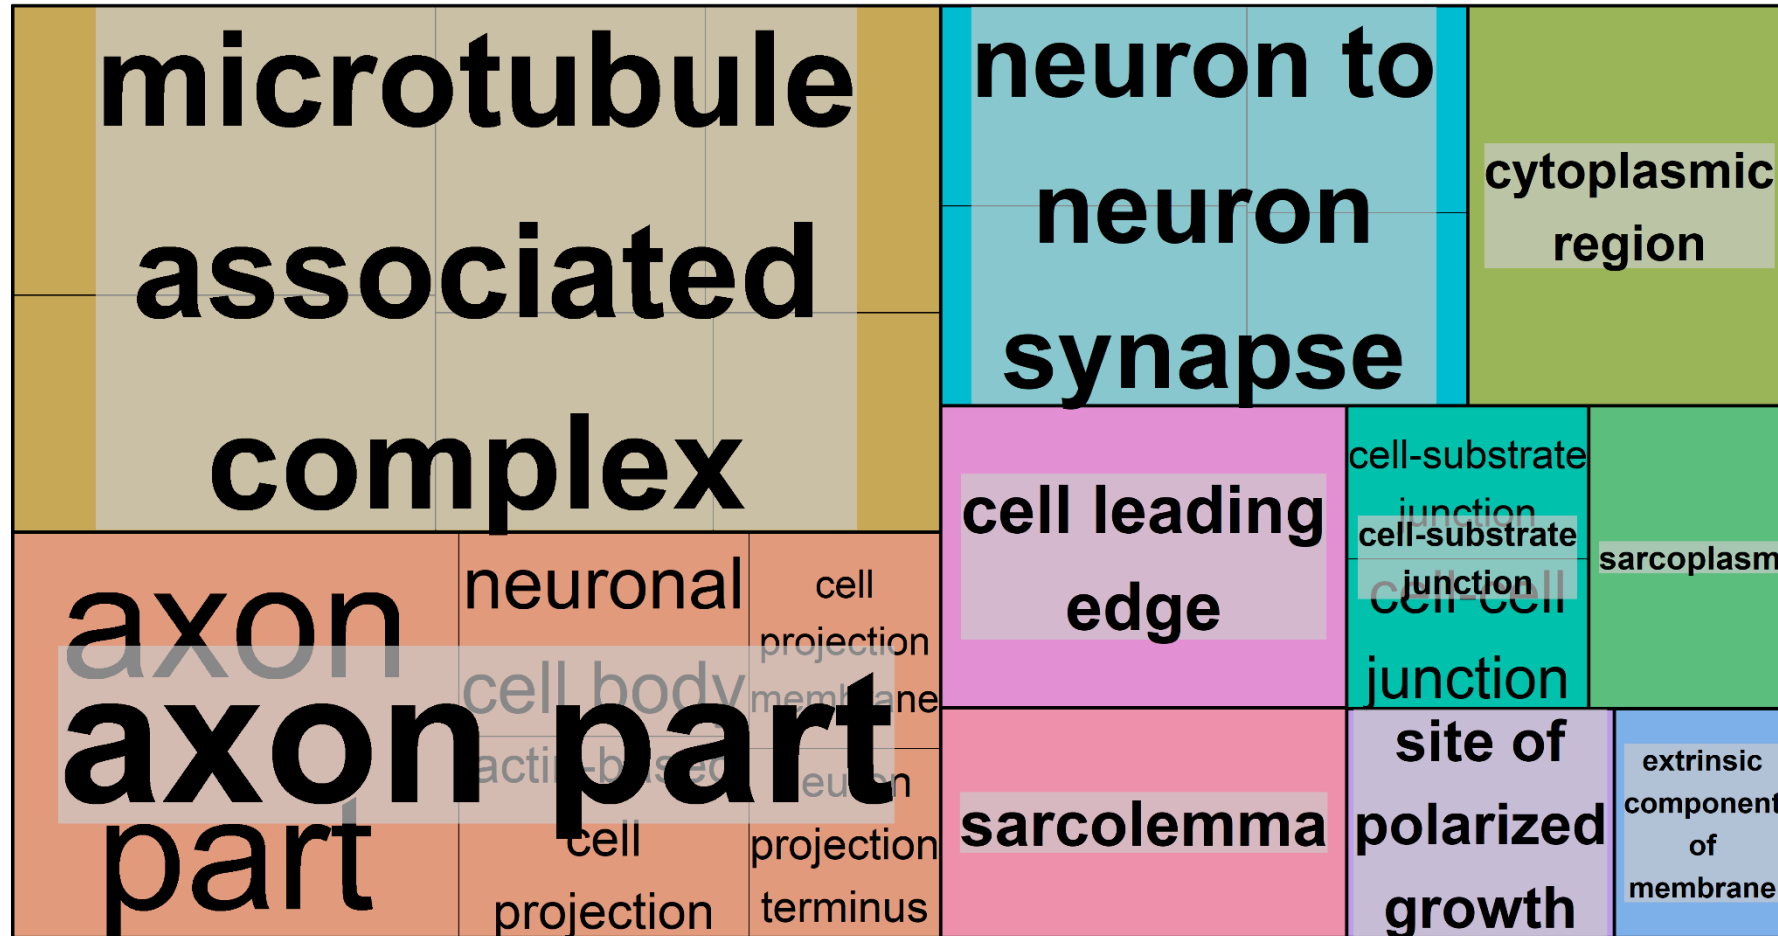

**Supplementary Figure 3A.**

Cellular Component terms found associated to genes with the longest transcript length (5%). The significance level was  $p < 0.05$  and the FDR was set at 0.05. FDR estimation was done using the Benjamini-Hochberg method.

## Molecular Function terms for the longest genes

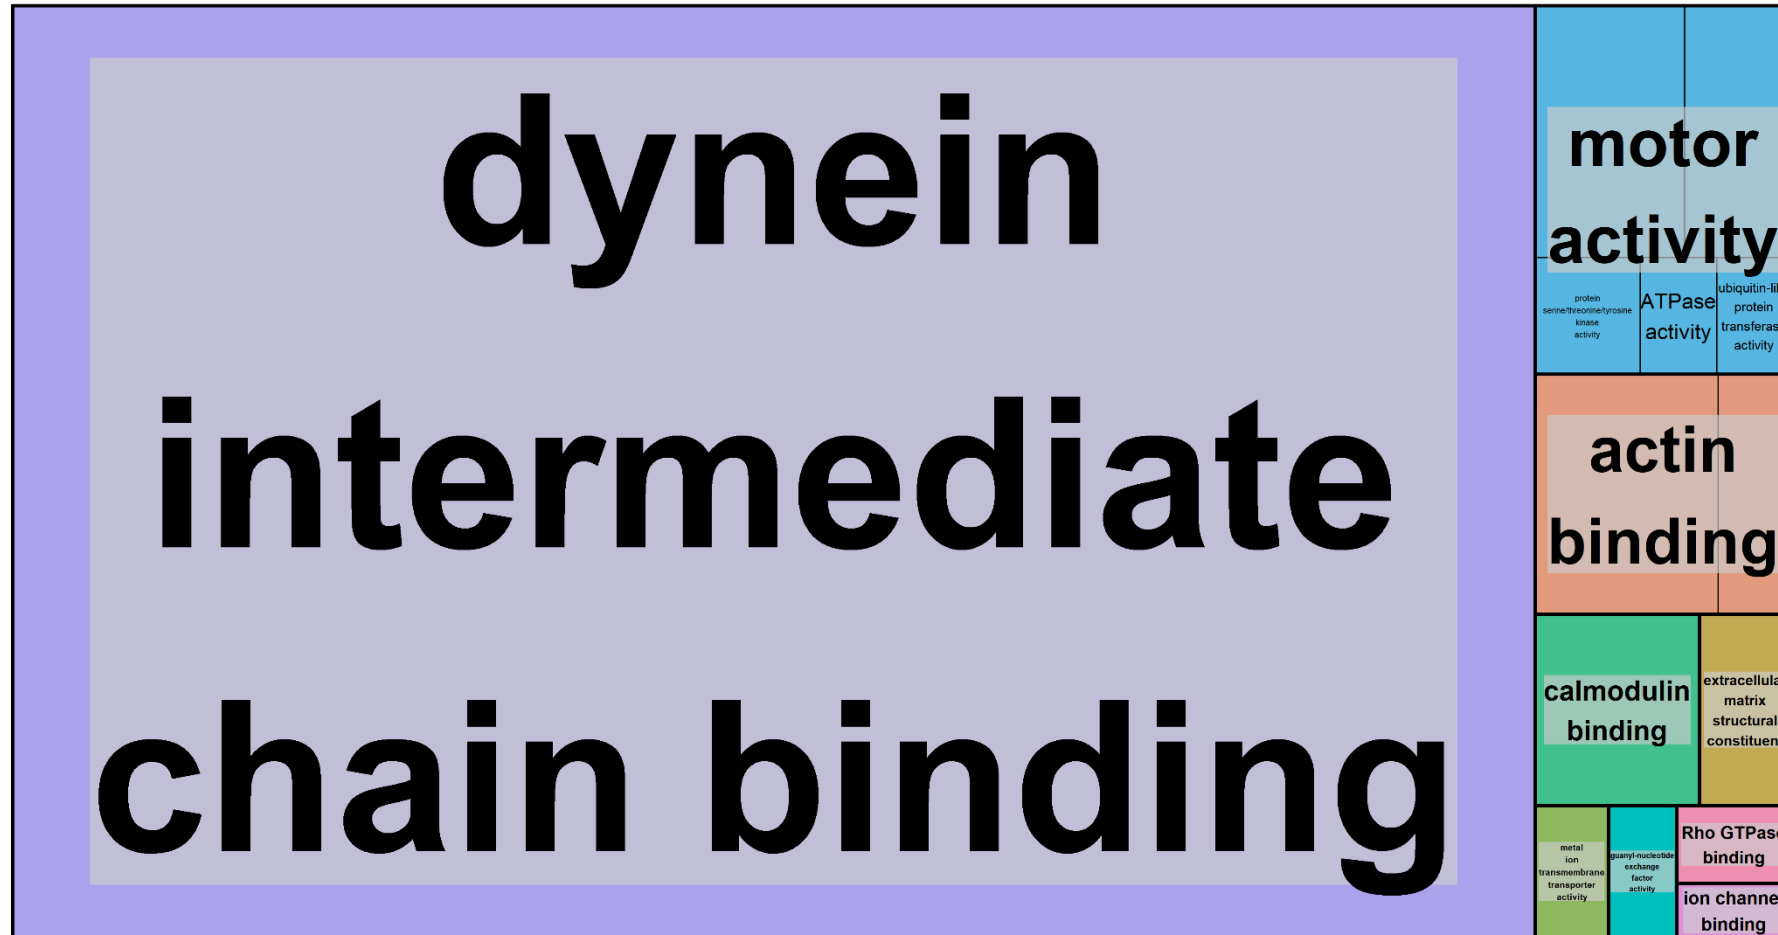

### Supplementary Figure 3B.

Molecular Function terms found associated to genes with the longest transcript length (5%). The significance level was  $p < 0.05$  and the FDR was set at 0.05. FDR estimation was done using the Benjamini-Hochberg method.

### Cellular Component terms for the smallest genes

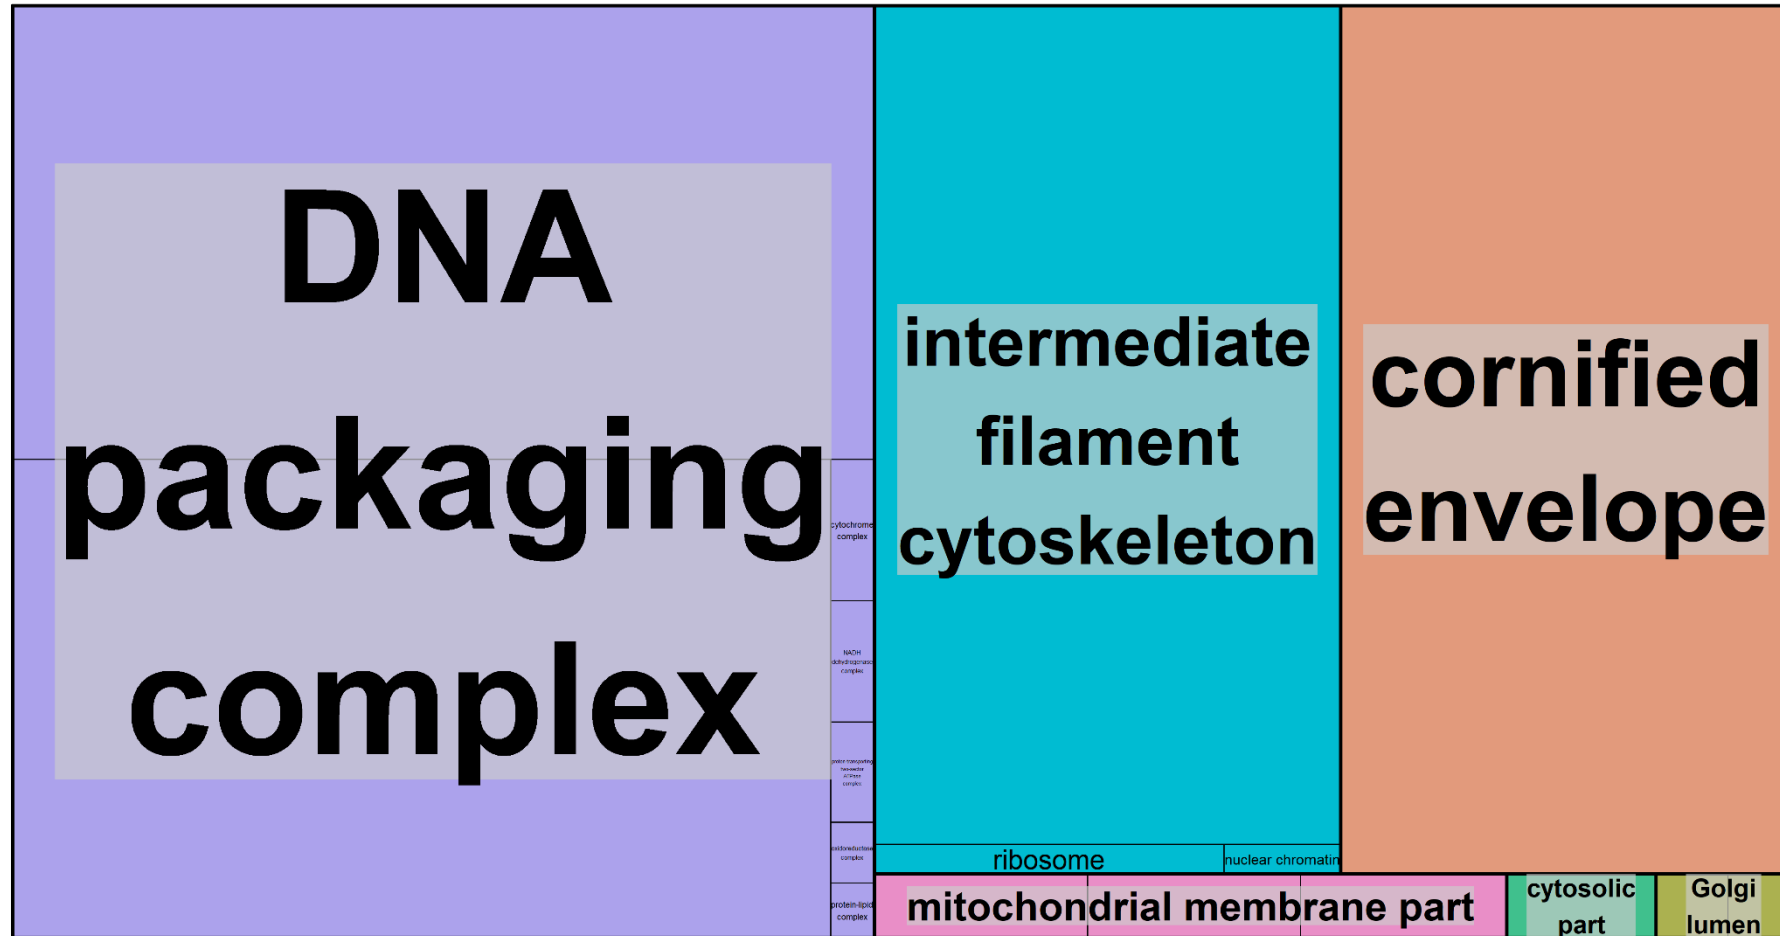

### Supplementary Figure 3C.

Cellular Component terms found associated to genes with the smallest transcript length (5%). The significance level was  $p < 0.05$  and the FDR was set at 0.05. FDR estimation was done using the Benjamini-Hochberg method.

Molecular Function terms for the smallest genes

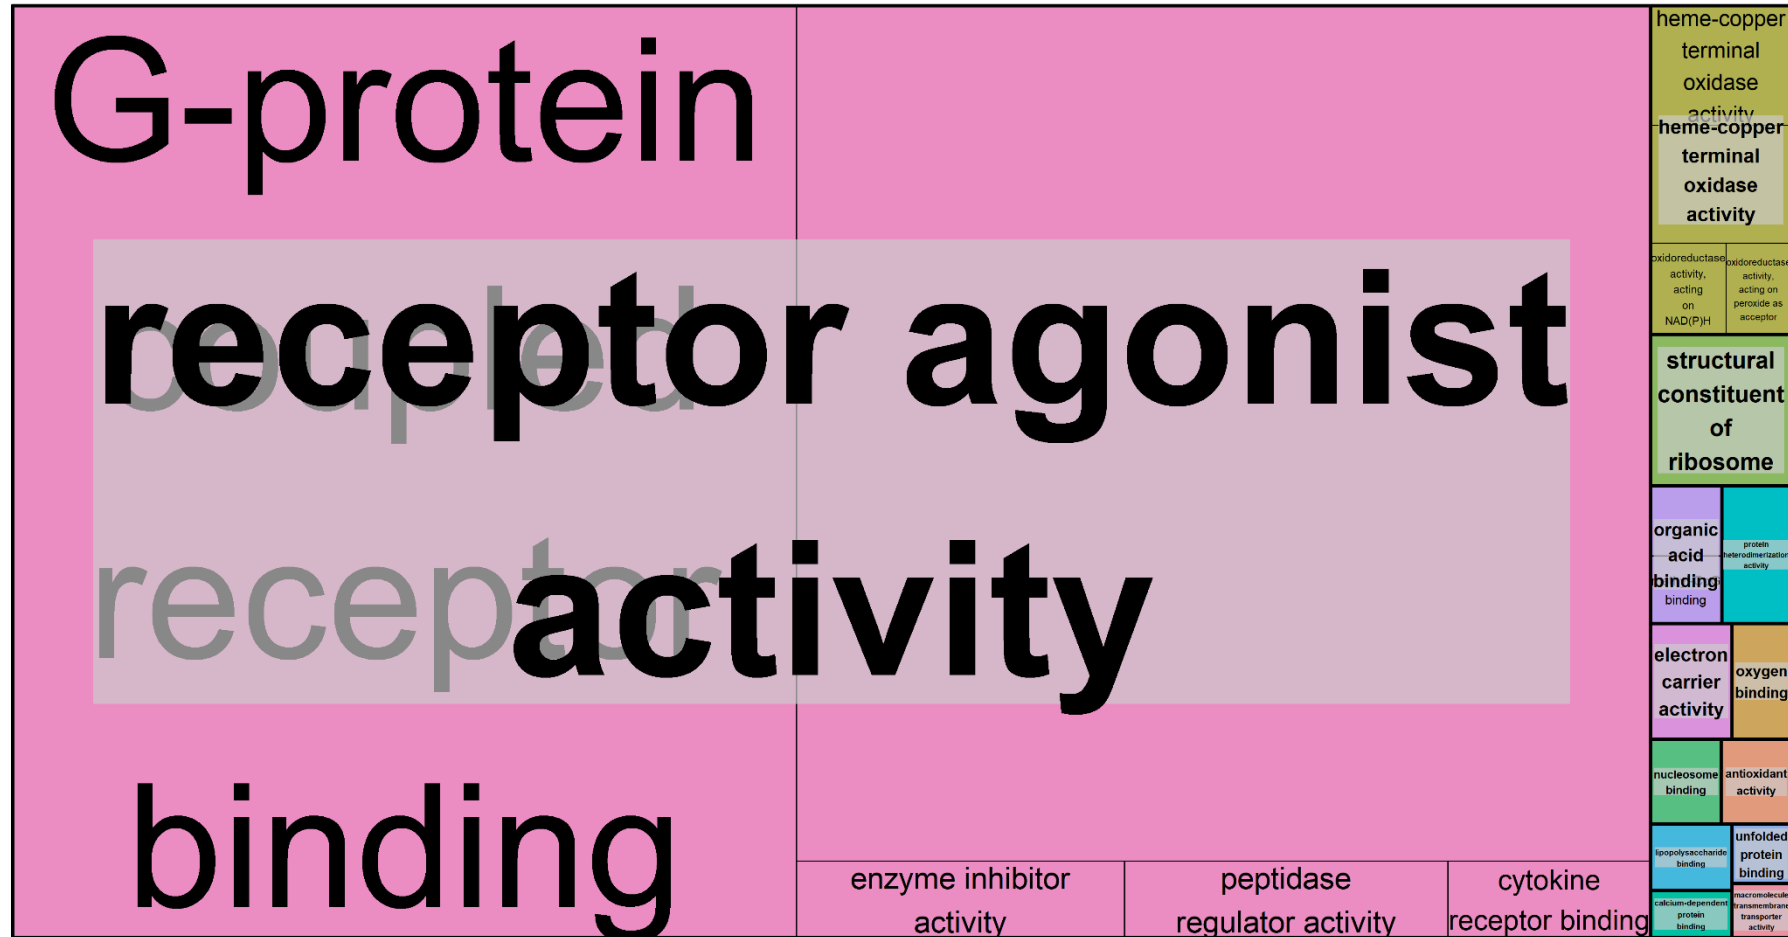

**Supplementary Figure 3D.**

Molecular Function terms found associated to genes with the smallest transcript length (5%). The significance level was  $p < 0.05$  and the FDR was set at 0.05. FDR estimation was done using the Benjamini–Hochberg method.

## Biological Process terms for the top 10% longest genes

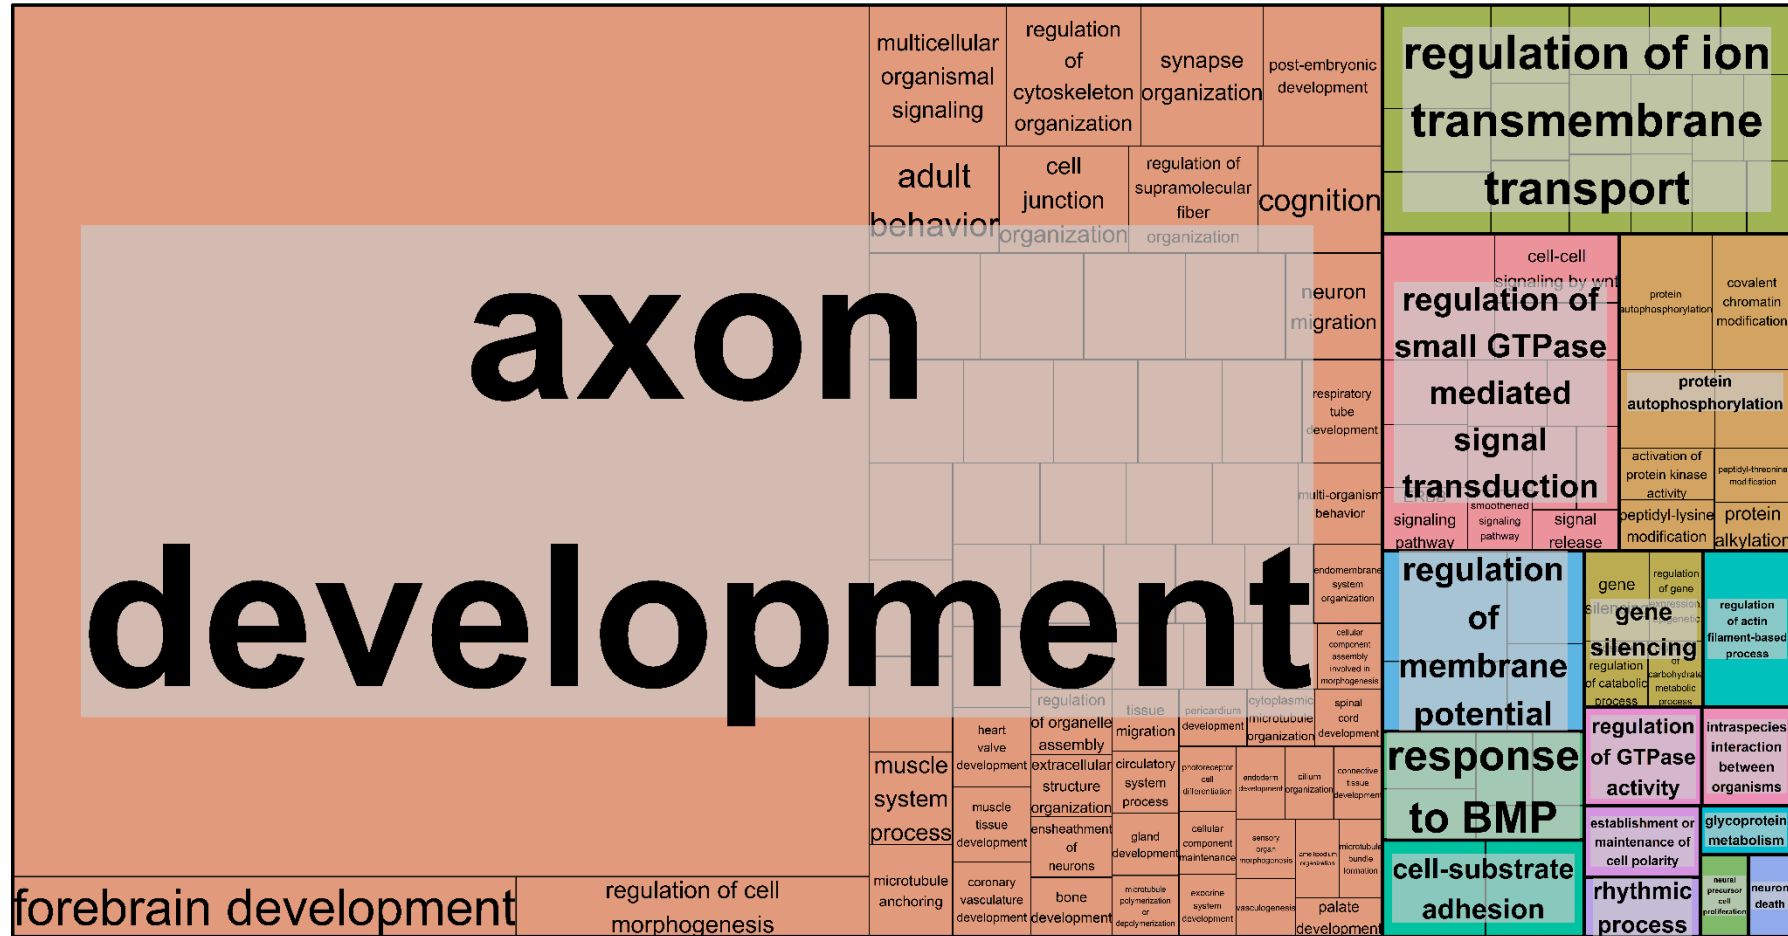

### Supplementary Figure 3E.

Biological Process terms found associated to genes with the longest transcript length (10%). The significance level was  $p < 0.05$  and the FDR was set at 0.05. FDR estimation was done using the Benjamini–Hochberg method.

Cellular Component terms for the top 10% longest genes

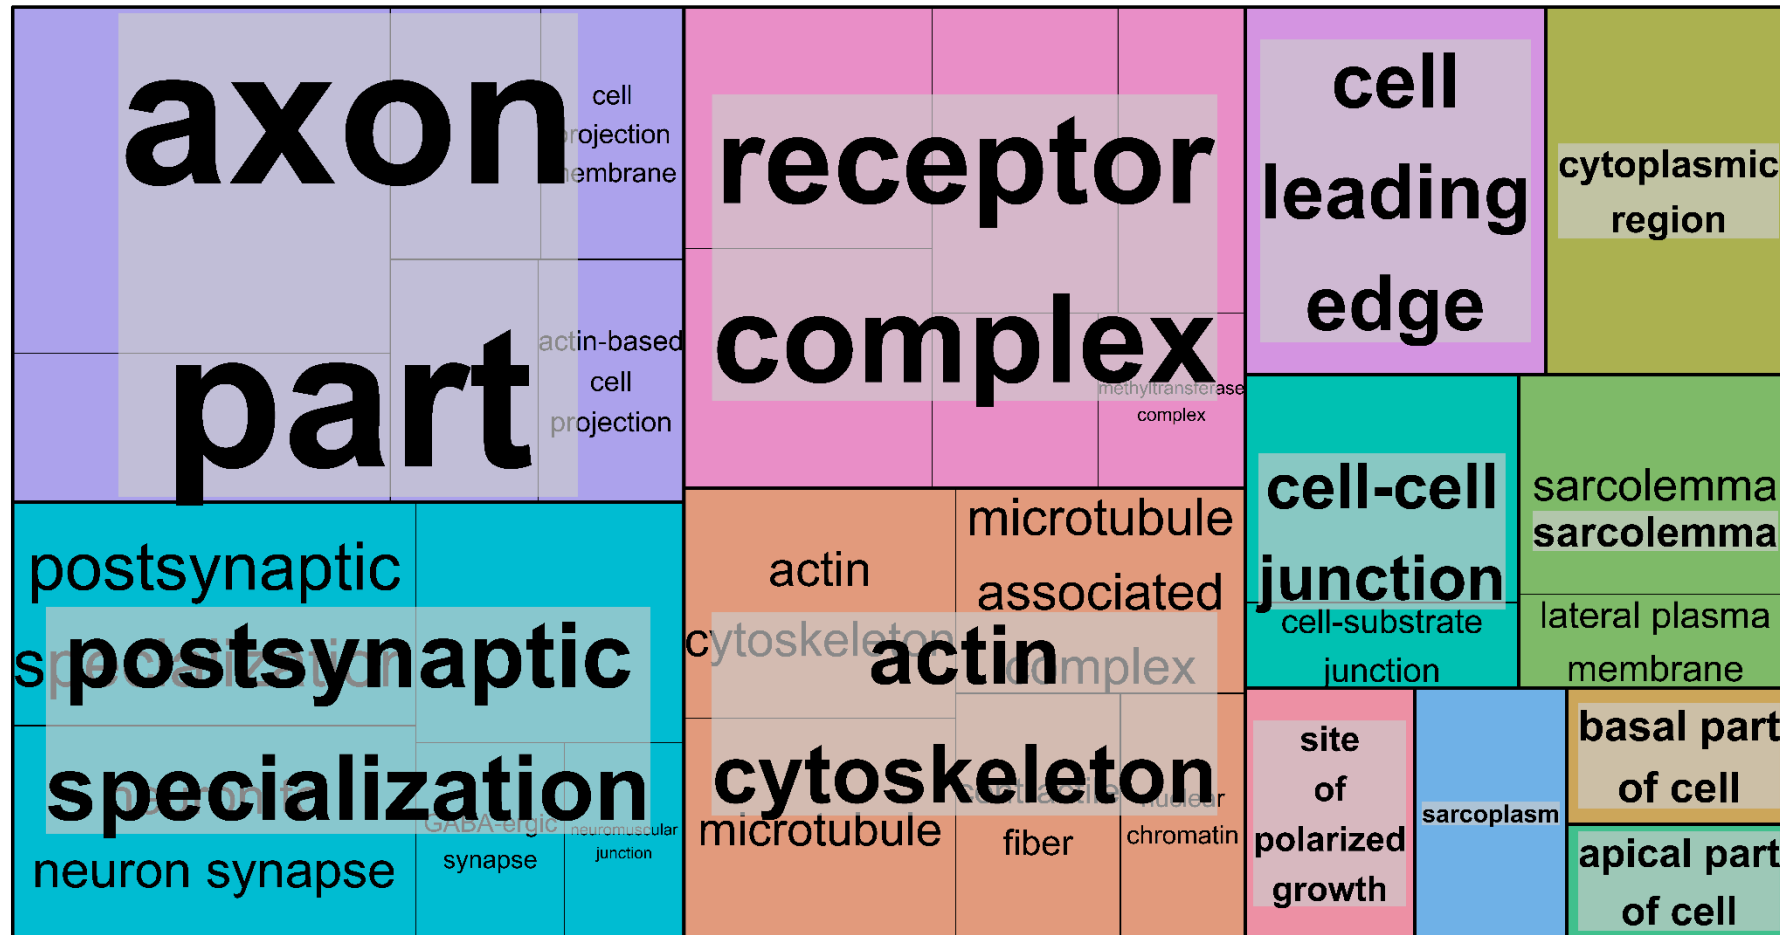

**Supplementary Figure 3F.**

Cellular Component terms found associated to genes with the longest transcript length (10%). The significance level was  $p < 0.05$  and the FDR was set at 0.05. FDR estimation was done using the Benjamini-Hochberg method.

Molecular Function terms for the top 10% longest genes

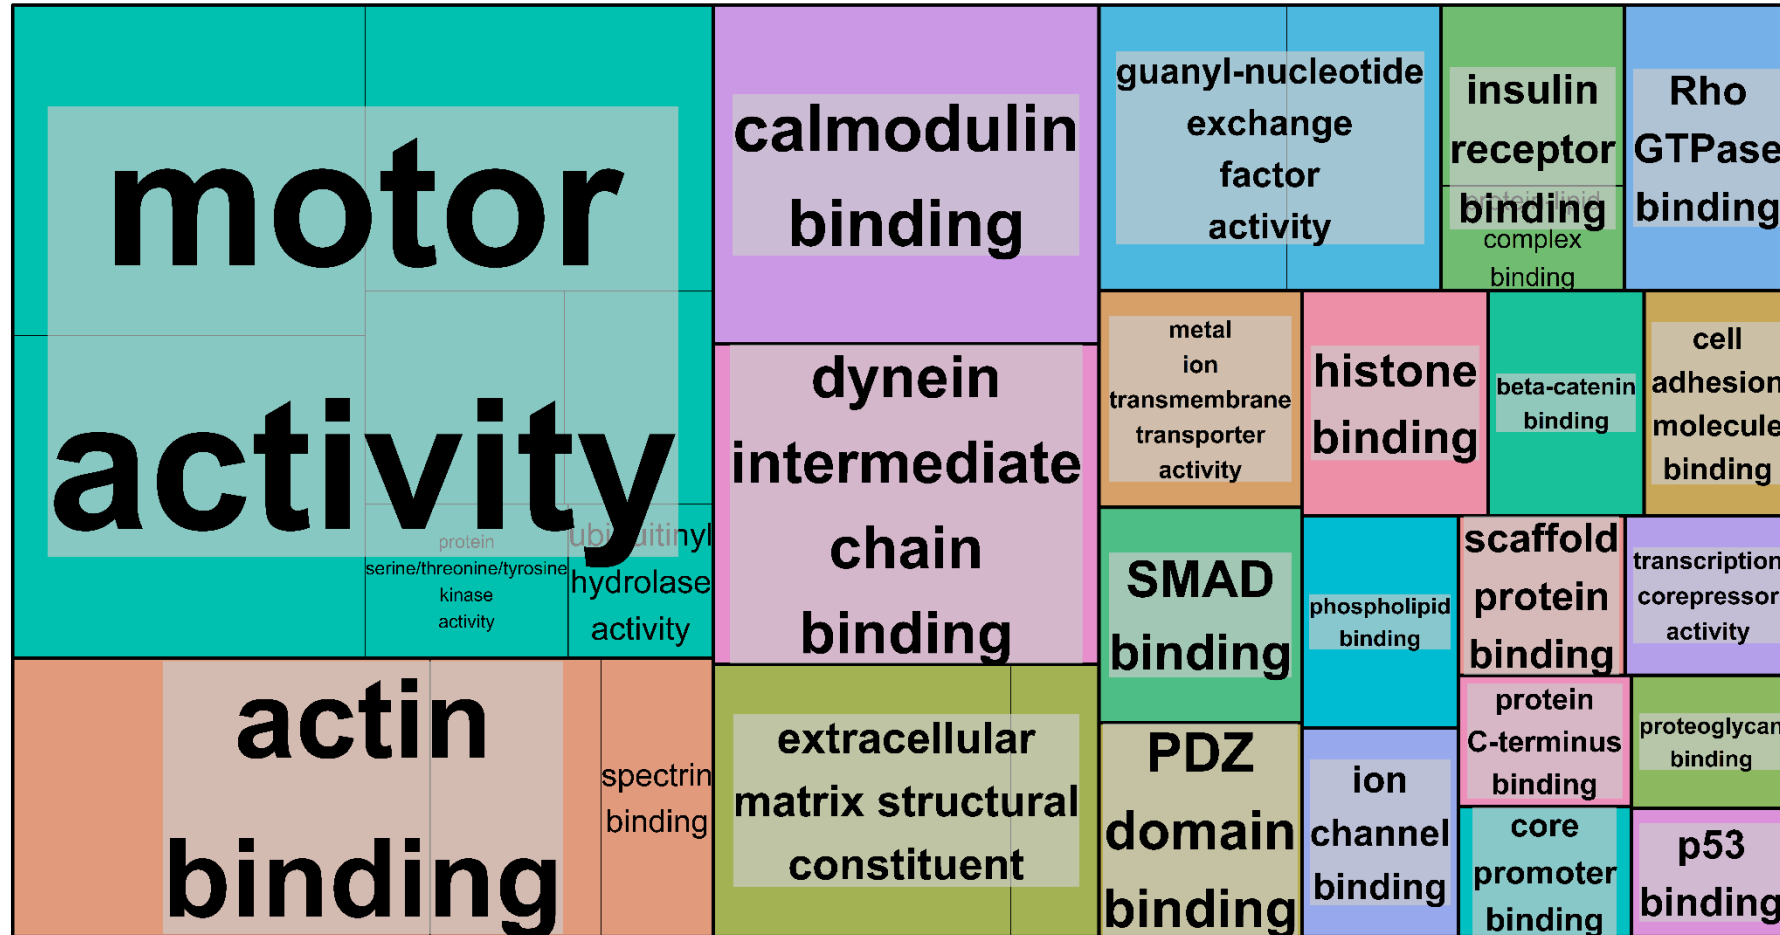

**Supplementary Figure 3G.**

Molecular Function terms found associated to genes with the longest transcript length (10%). The significance level was  $p < 0.05$  and the FDR was set at 0.05. FDR estimation was done using the Benjamini–Hochberg method.

Biological Process terms for the top 10% smallest genes

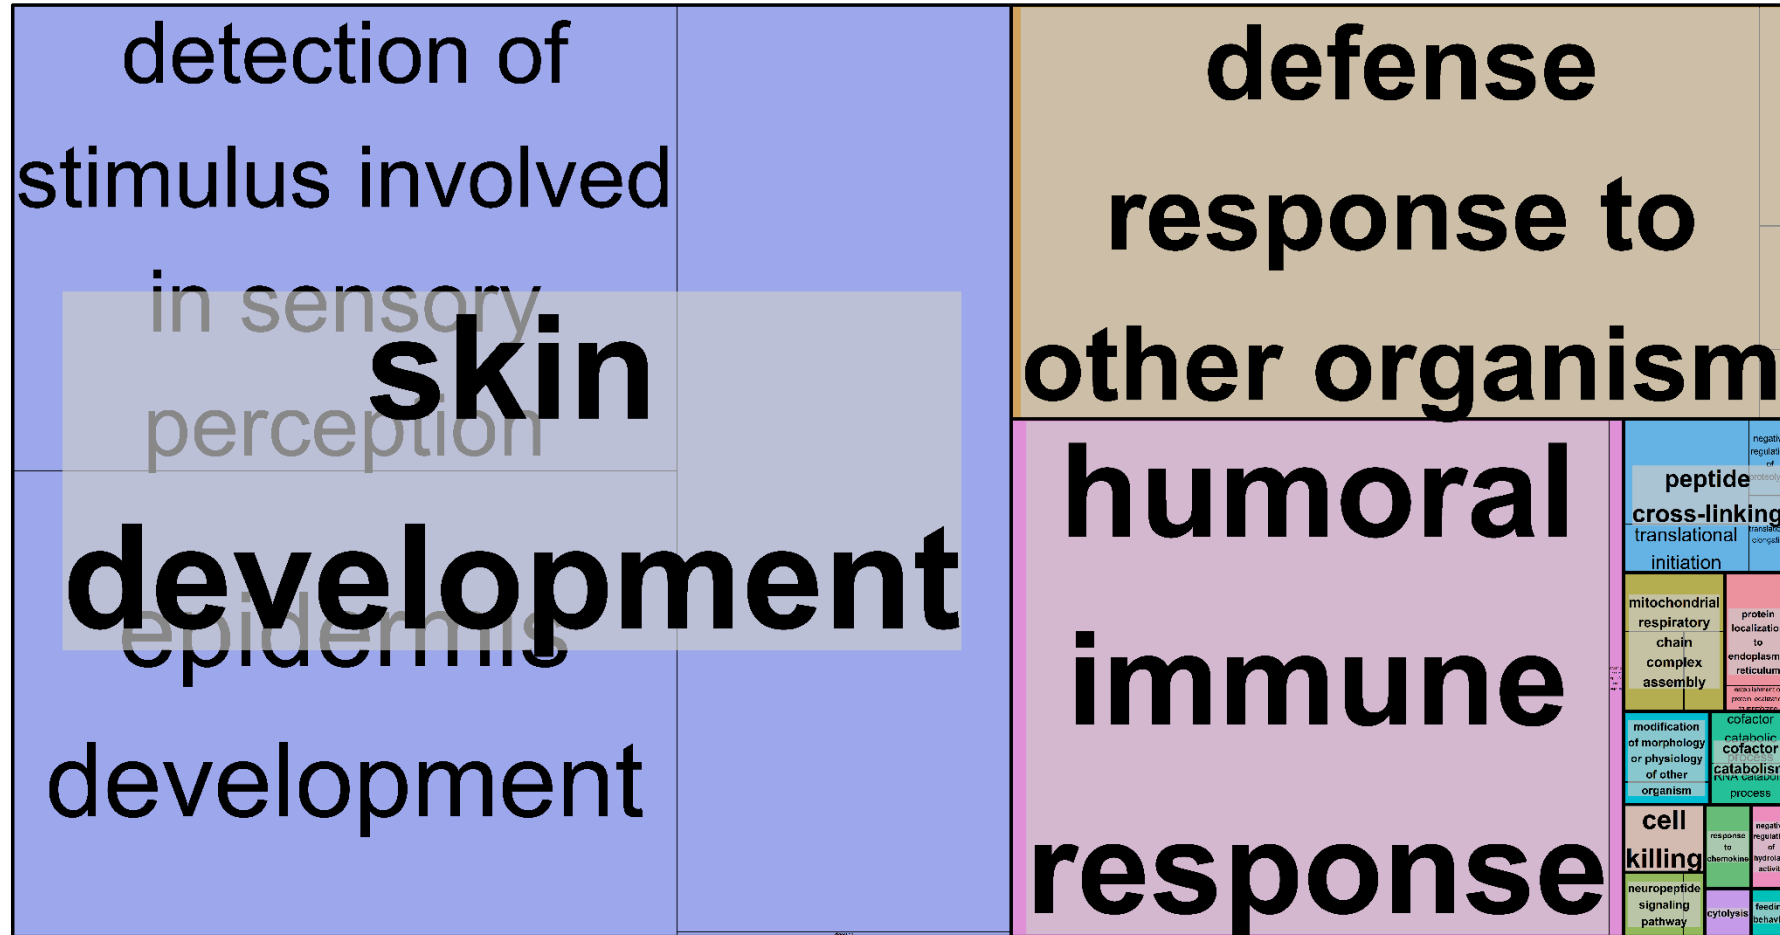

**Supplementary Figure 3H.**

Biological Process terms found associated to genes with the smallest transcript length (10%). The significance level was  $p < 0.05$  and the FDR was set at 0.05. FDR estimation was done using the Benjamini–Hochberg method.



Cellular Component terms for the top 10% smallest genes

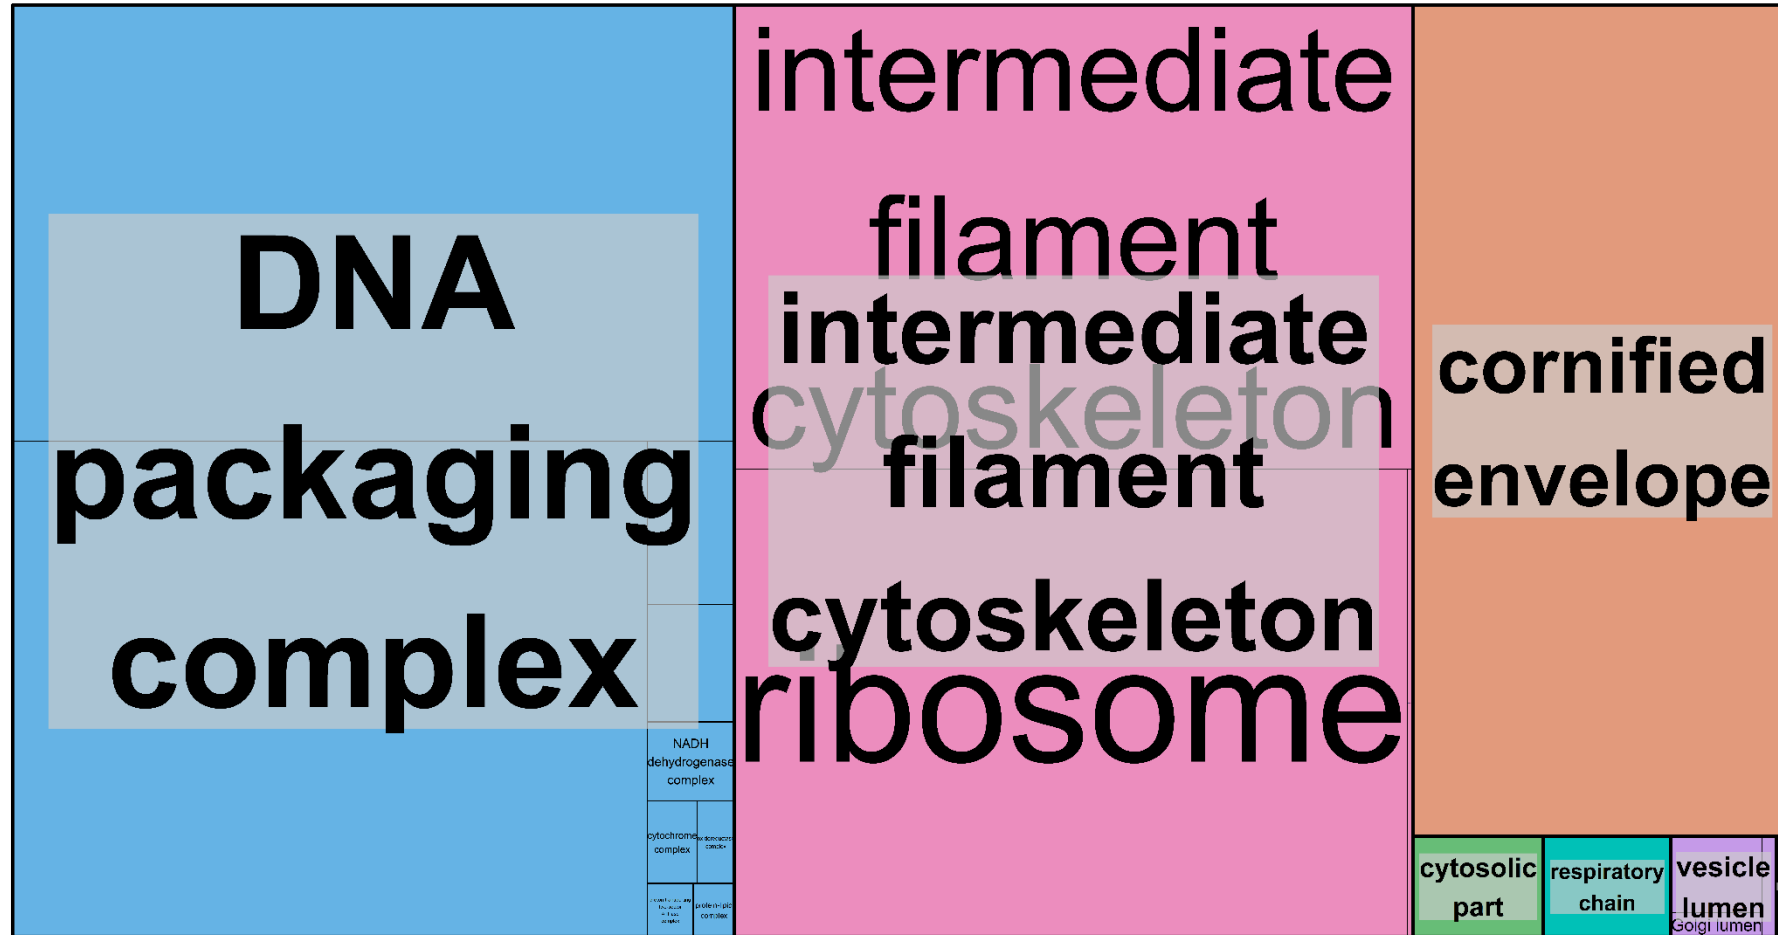

**Supplementary Figure 3I.**

Cellular Component terms found associated to genes with the smallest transcript length (10%). The significance level was  $p < 0.05$  and the FDR was set at 0.05. FDR estimation was done using the Benjamini–Hochberg method.

Molecular Function terms for the top 10% smallest genes

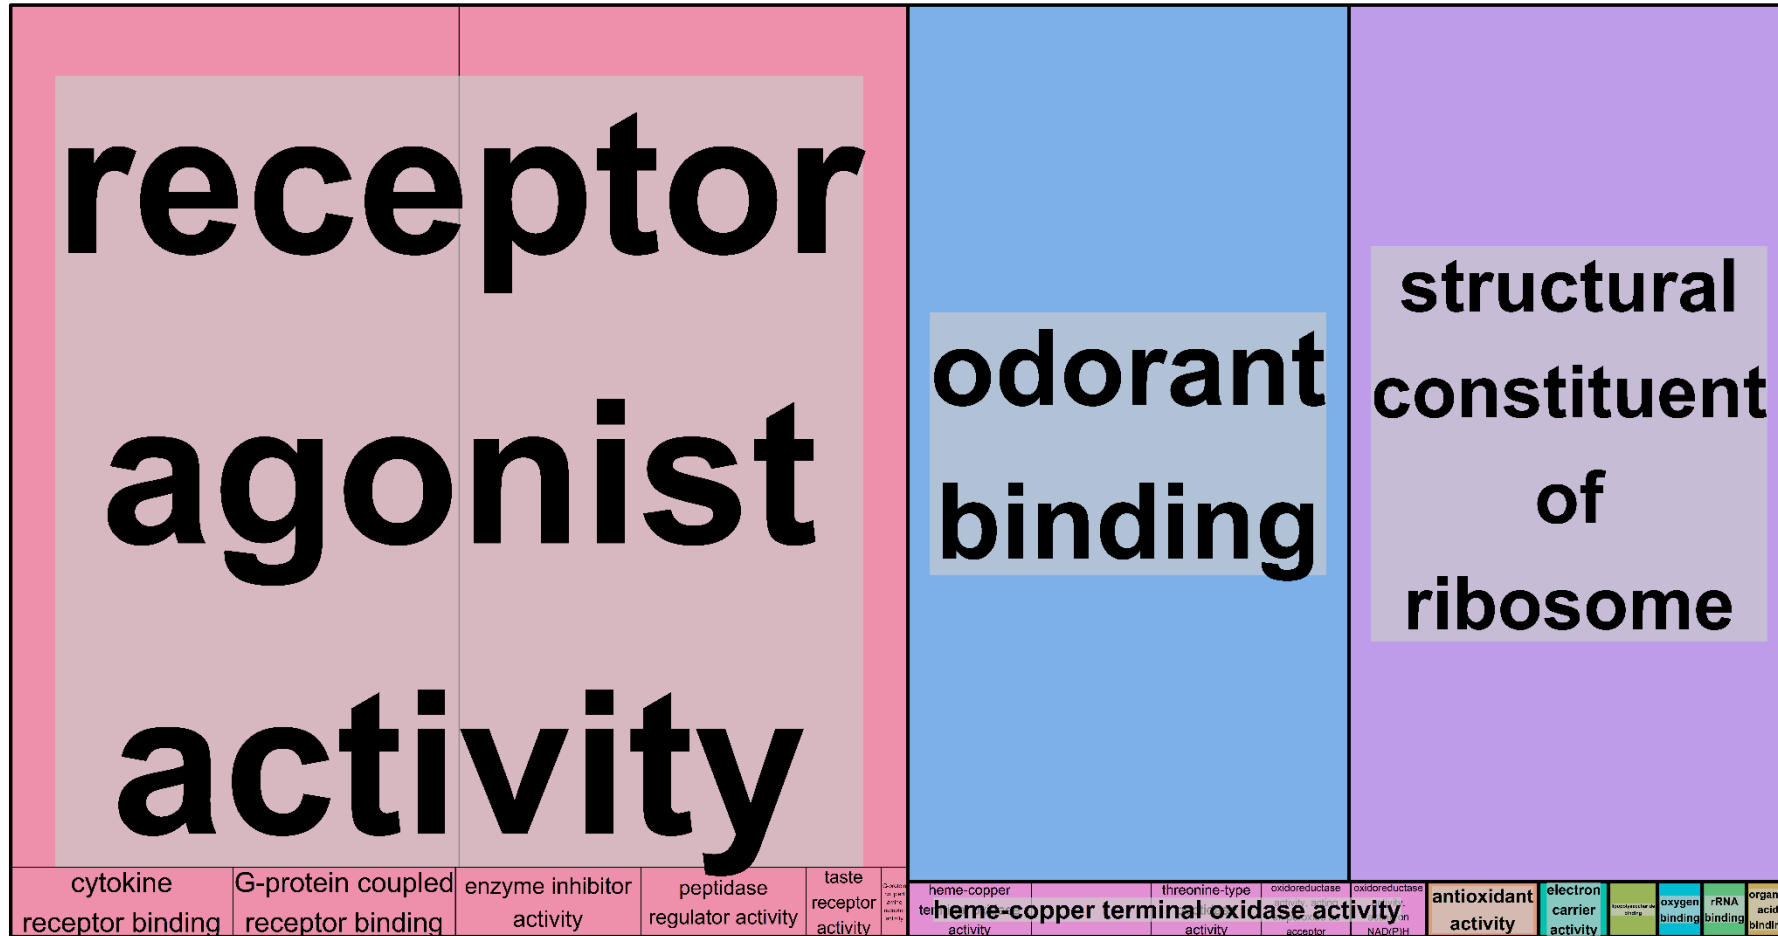

**Supplementary Figure 3J.**

Molecular Function terms found associated to genes with the smallest transcript length (10%). The significance level was  $p < 0.05$  and the FDR was set at 0.05. FDR estimation was done using the Benjamini–Hochberg method.
