# Supplementary material for: Gene Size Matters: An Analysis of Gene Length in the Human Genome
Source: PubMed Central journal article supplement (PMC7905317; doi:10.3389/fgene.2021.559998), 2021-02-11
Supplement: Data_Sheet_5.pdf [file Data_Sheet_5.pdf]

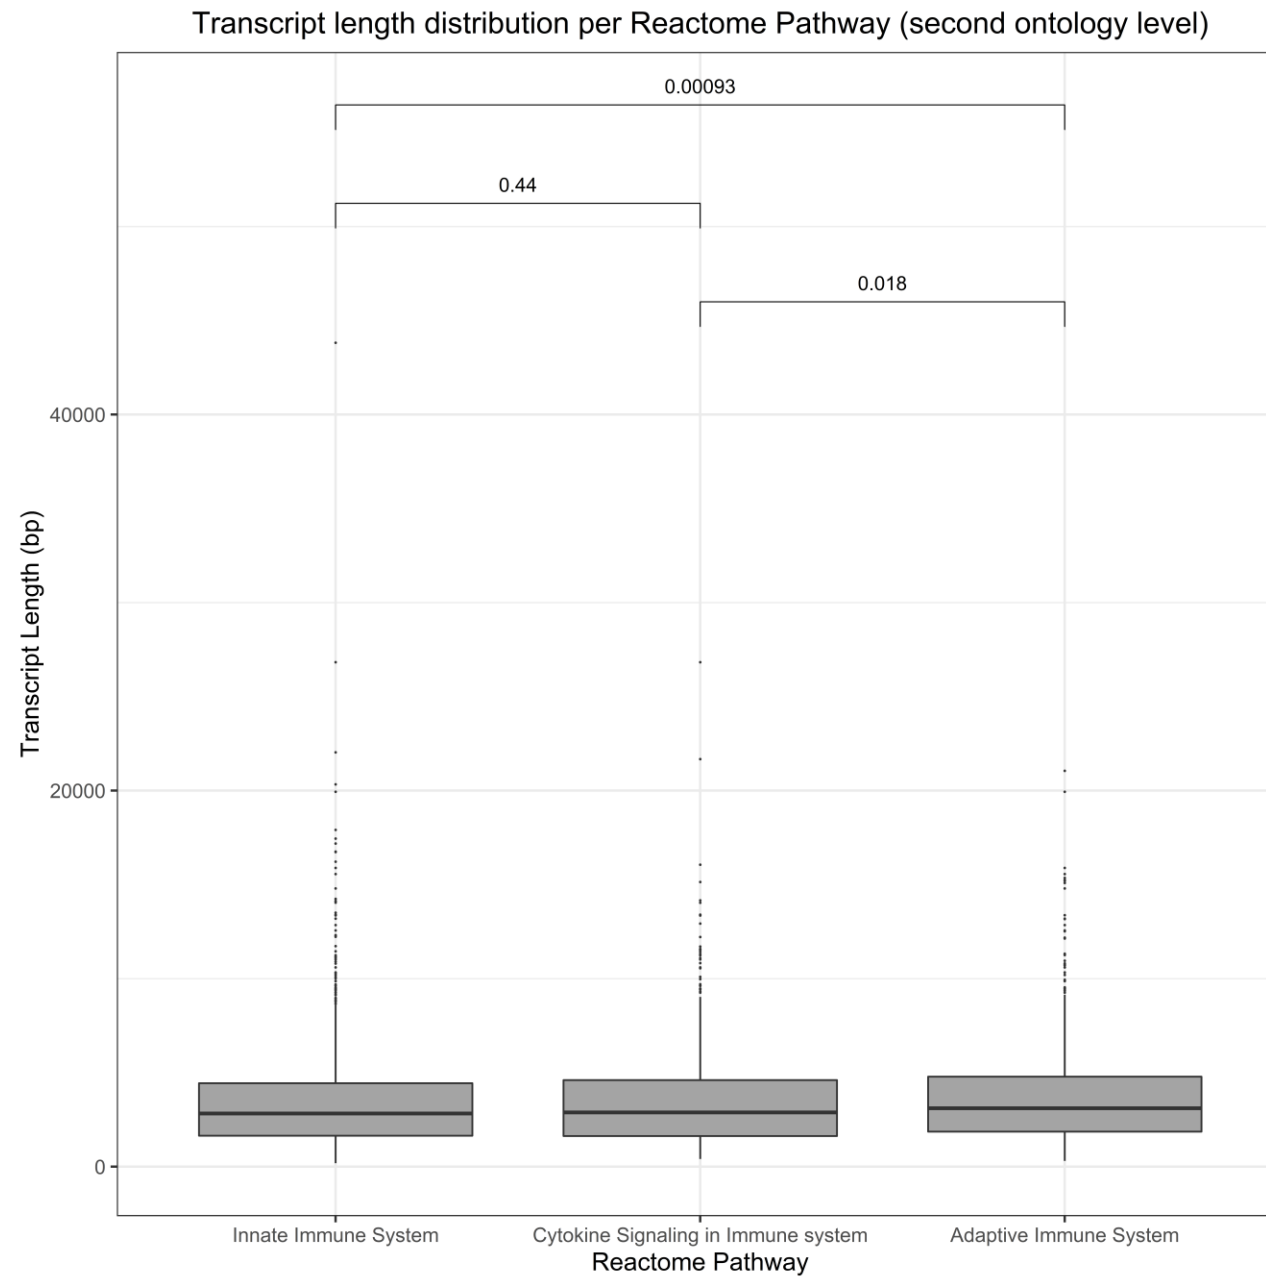

**Supplementary Figure 5A.**

Transcript length distribution per immune system pathway (second ontology level), from Reactome (Version 75).

### Transcript length distribution per Reactome Pathway (third ontology level)

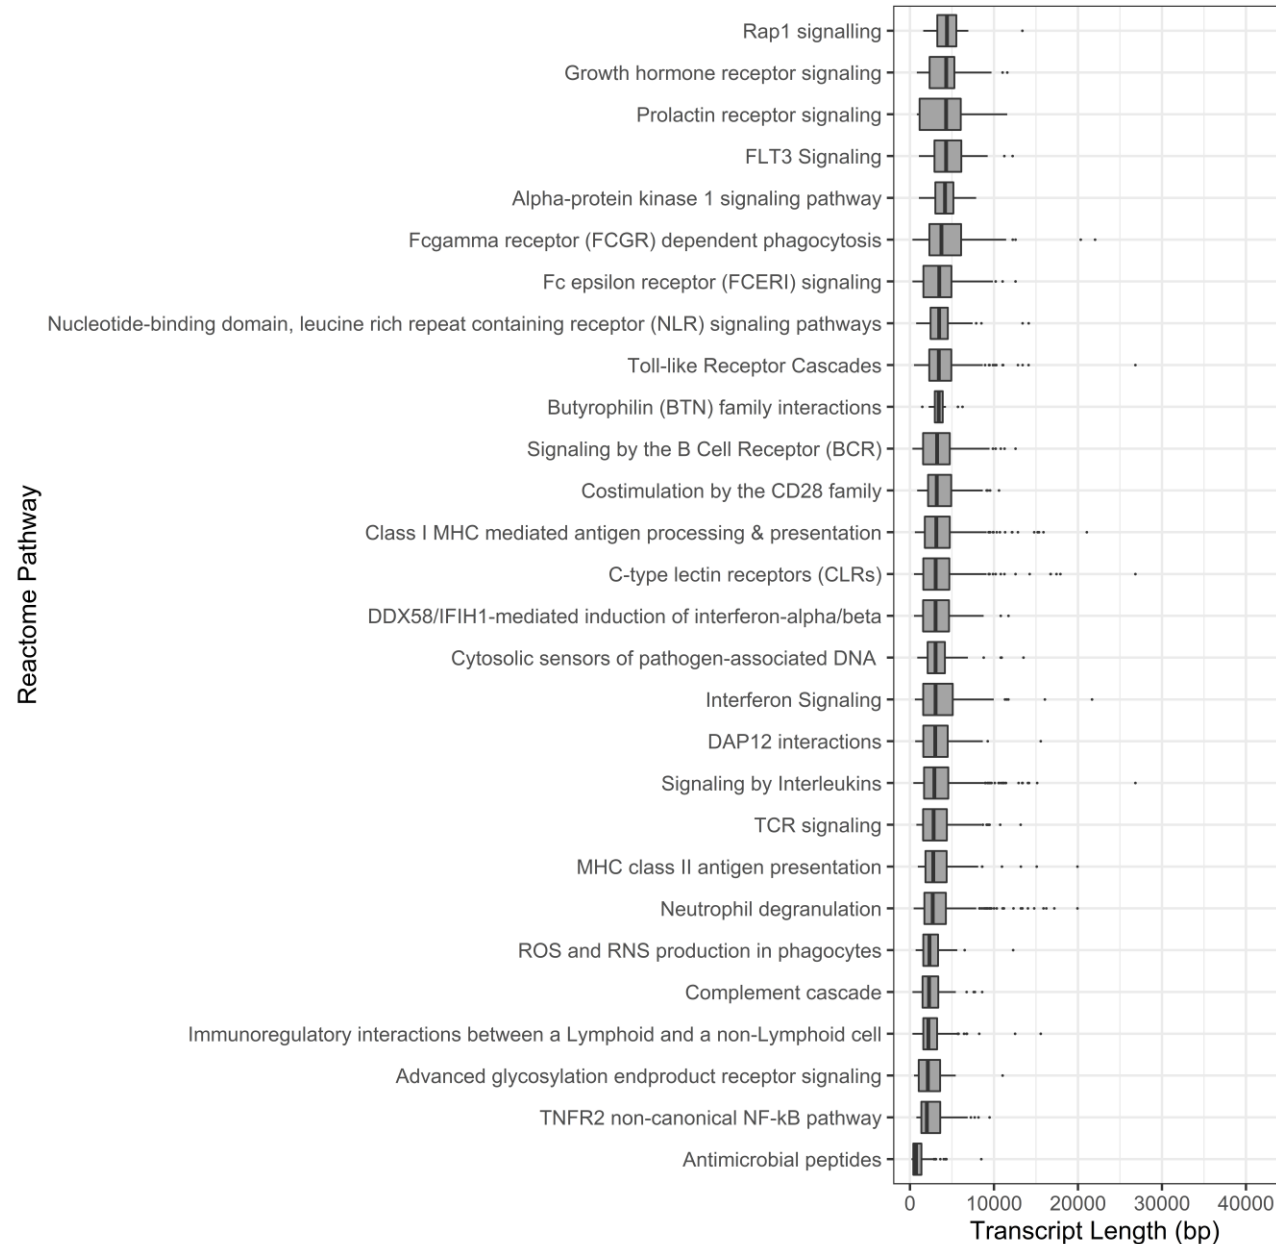

### Supplementary Figure 5B.

Transcript length distribution per immune system pathway (third ontology level), from Reactome (Version 75).

Transcript length distribution per Reactome Pathway (fourth ontology level)

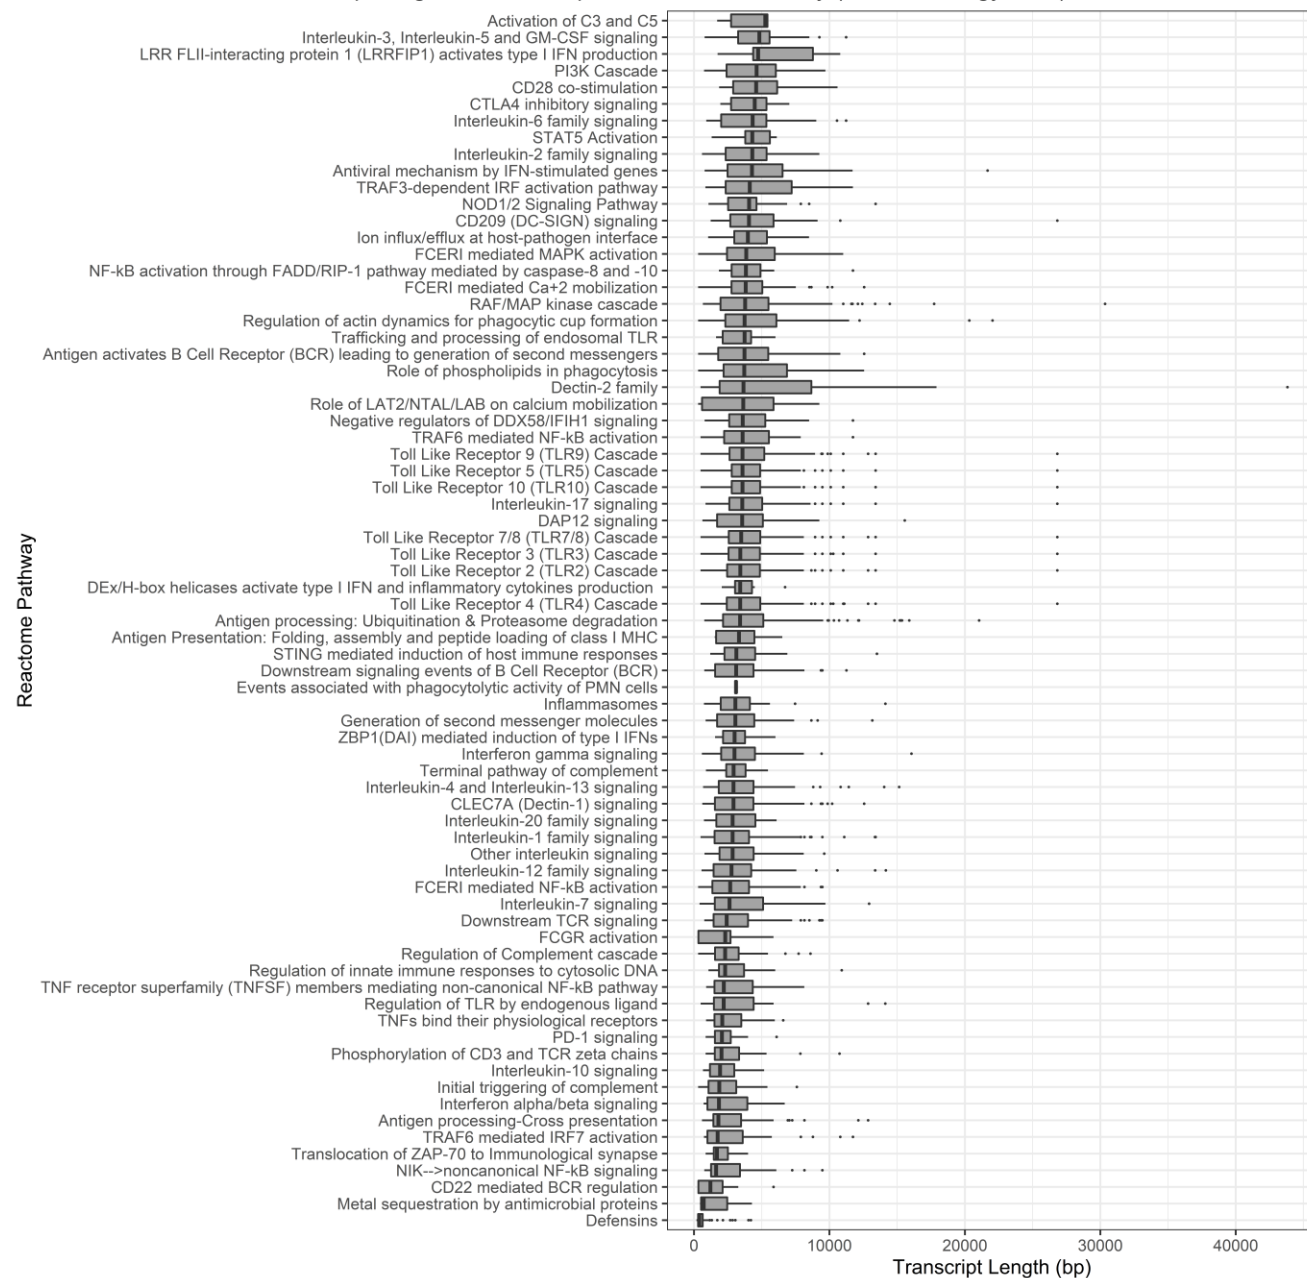

**Supplementary Figure 5C.**

Transcript length distribution per immune system pathway (fourth ontology level), from Reactome (Version 75).
