# Supplementary material for: Gene Size Matters: An Analysis of Gene Length in the Human Genome
Source: PubMed Central journal article supplement (PMC7905317; doi:10.3389/fgene.2021.559998), 2021-02-11
Supplement: Data_Sheet_7.pdf [file Data_Sheet_7.pdf]

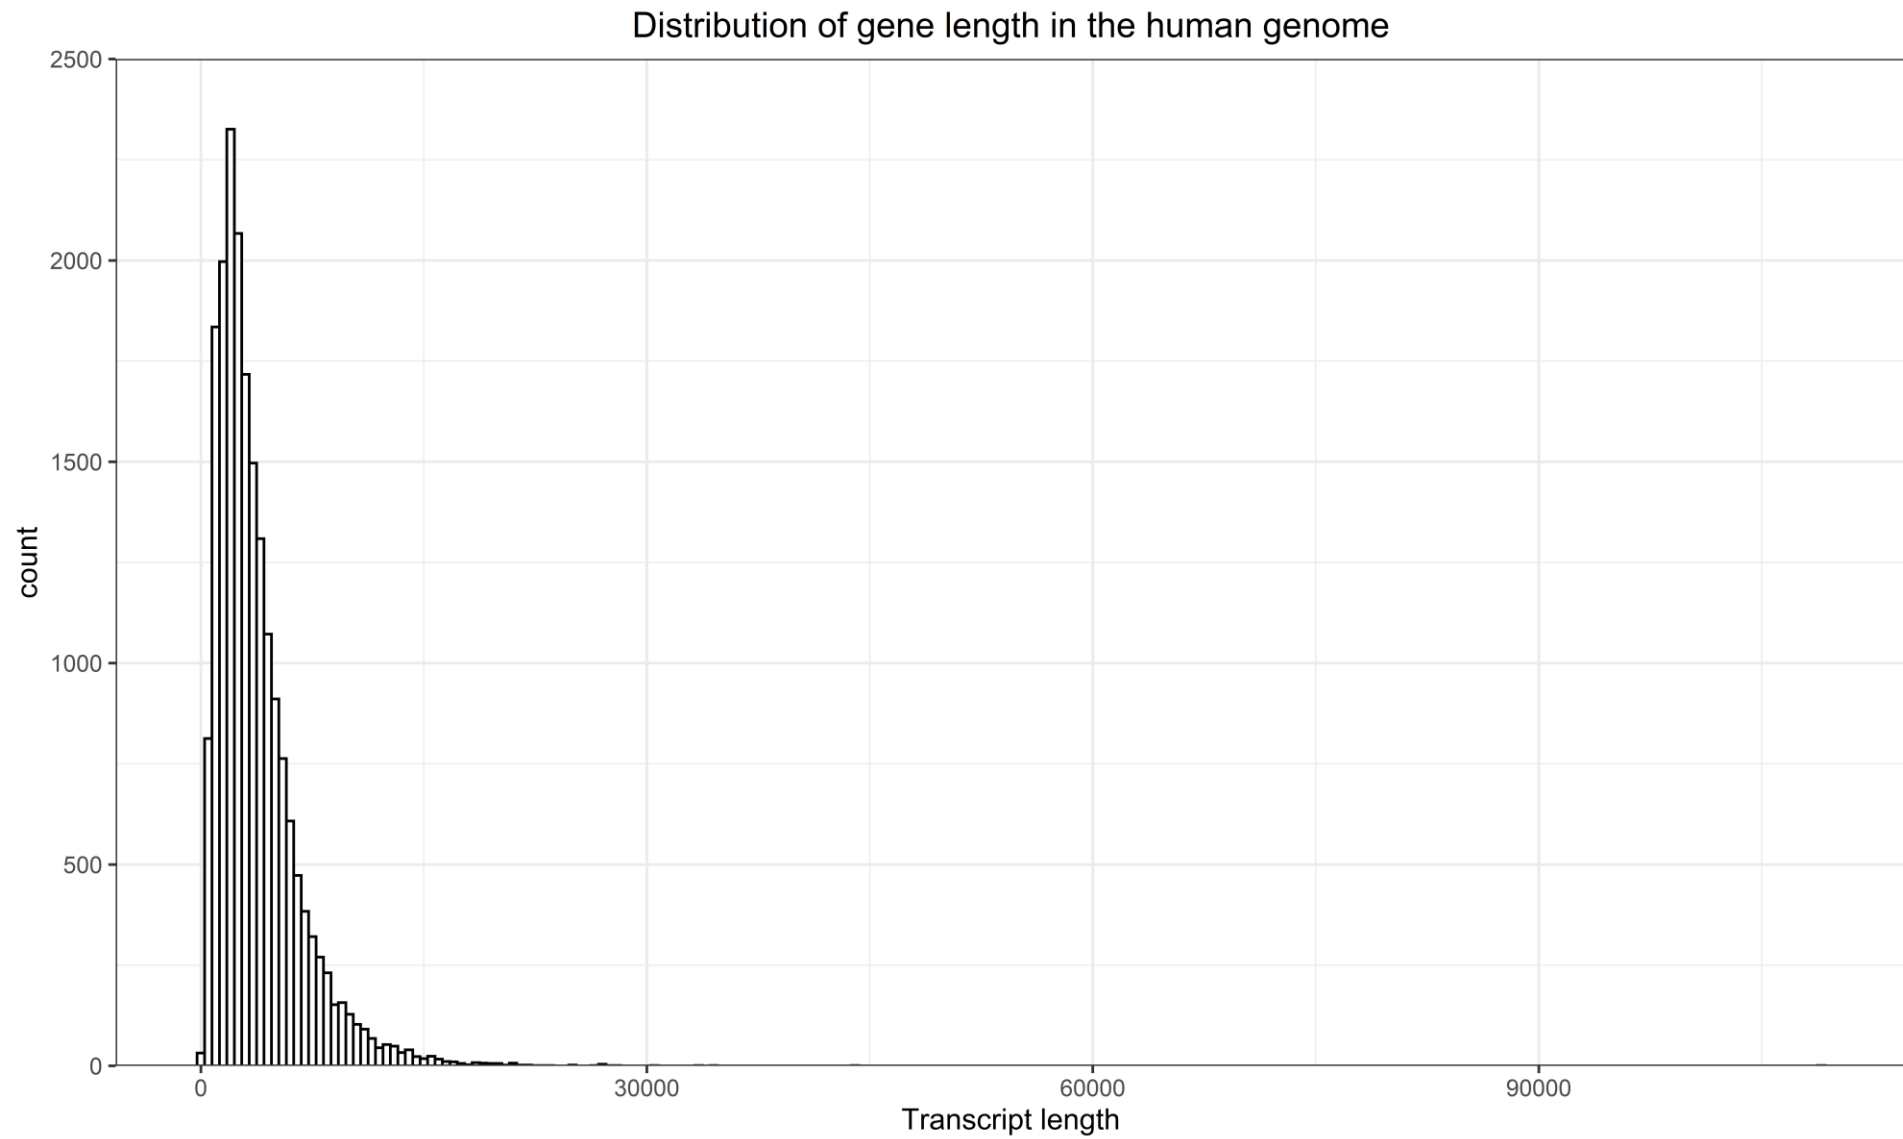

**Supplementary Figure 7A.**

Gene Length distribution in the human genome, for protein-coding genes only. Transcript Length was obtained from biomart.

Distribution of the number of introns in the human genome

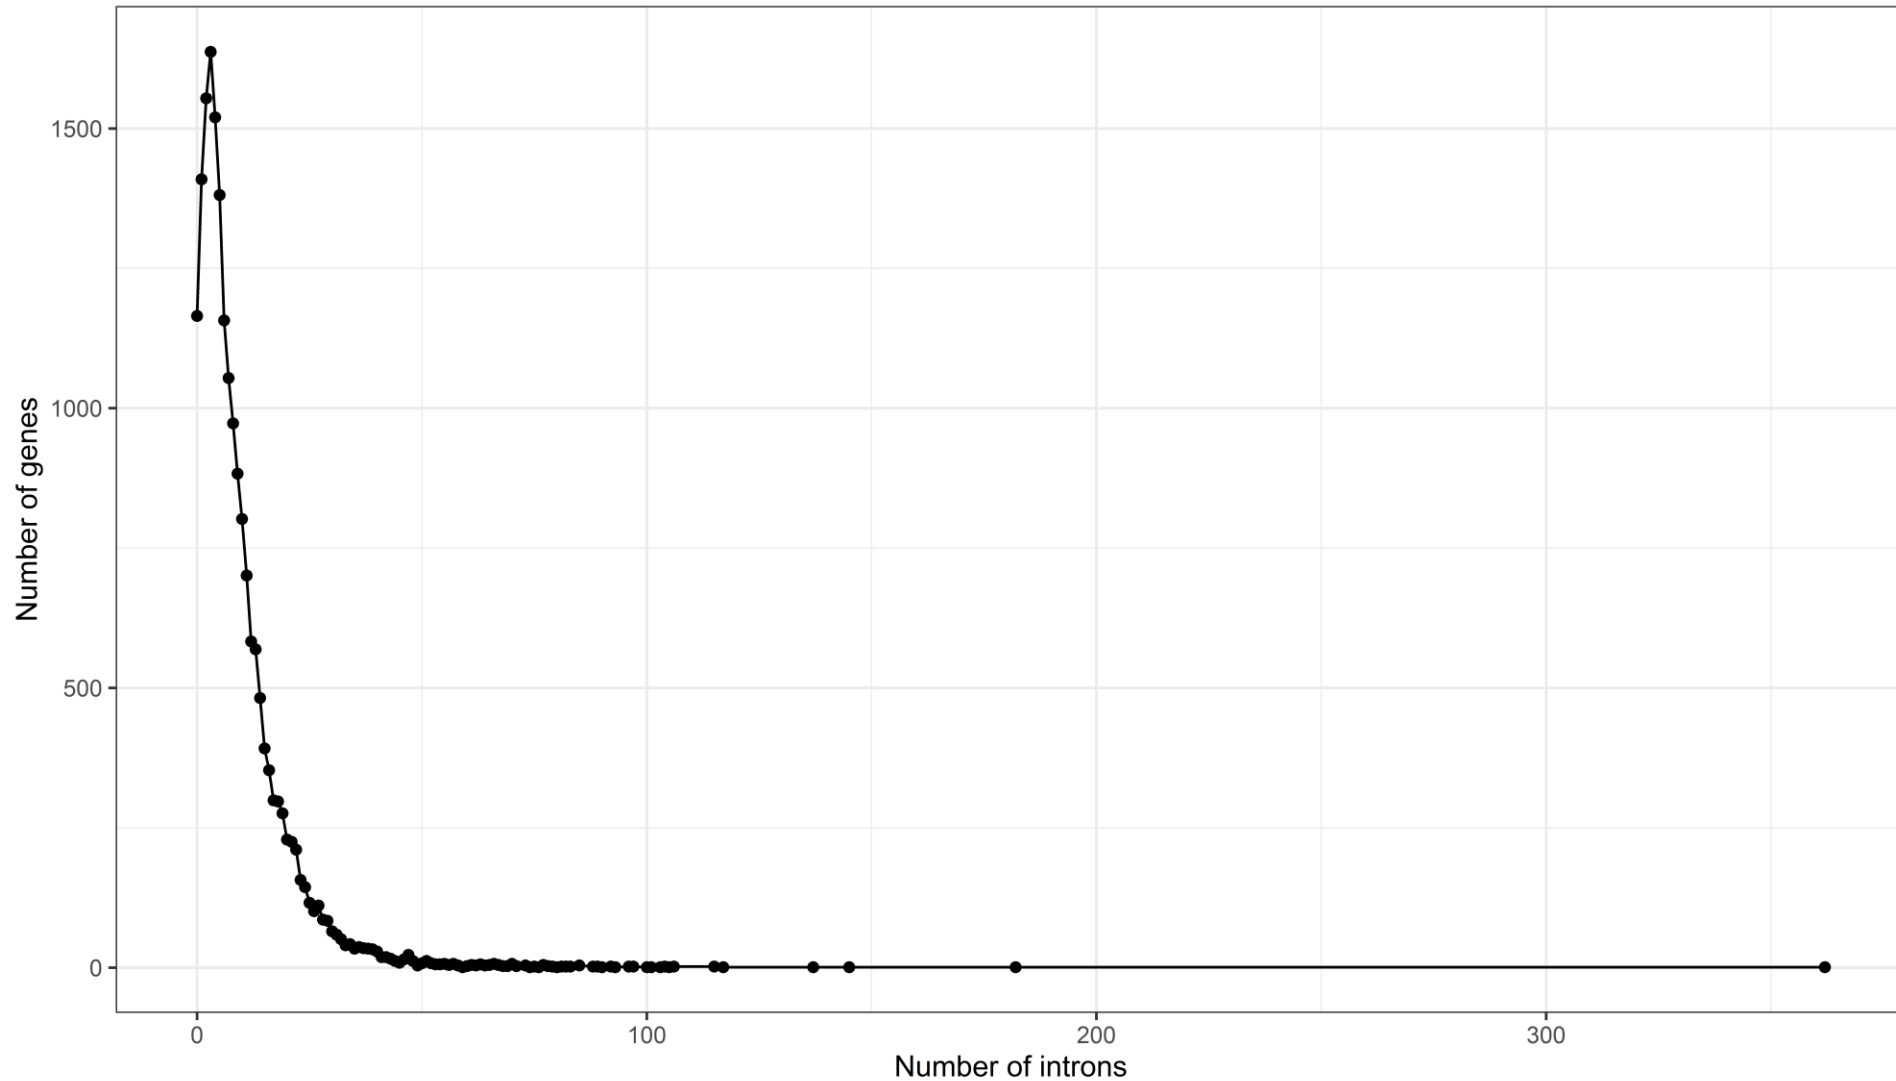

**Supplementary Figure 7B.**

Distributions of the number of introns in the human genome, for protein-coding genes only. The number of introns was obtained from biomart.
