# Supplementary material for: Gene Size Matters: An Analysis of Gene Length in the Human Genome
Source: PubMed Central journal article supplement (PMC7905317; doi:10.3389/fgene.2021.559998), 2021-02-11
Supplement: Data_Sheet_9.pdf [file Data_Sheet_9.pdf]

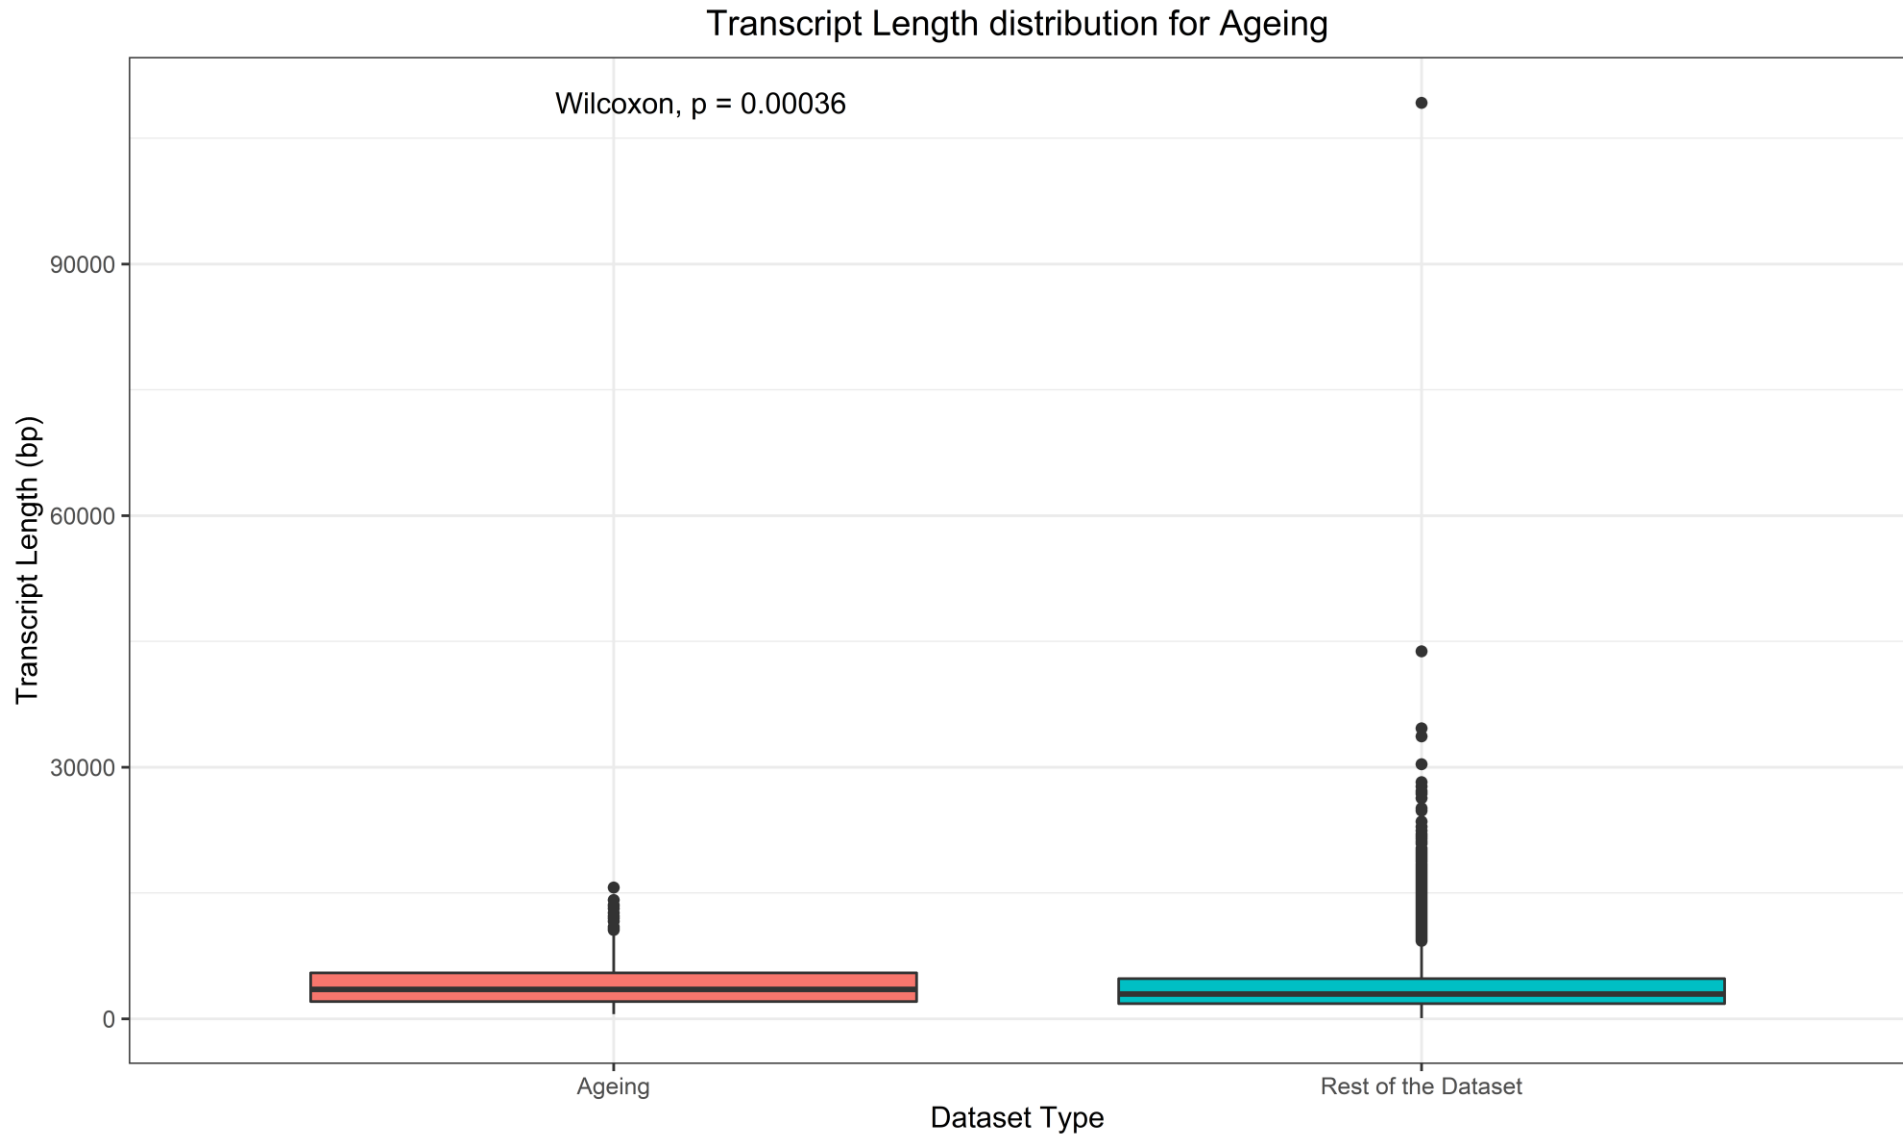

**Supplementary Figure 9A.**

Transcript length distribution for Ageing related genes and for the rest of the dataset. Ageing related genes were obtained from GenAge and Transcript Length was obtained from biomart.

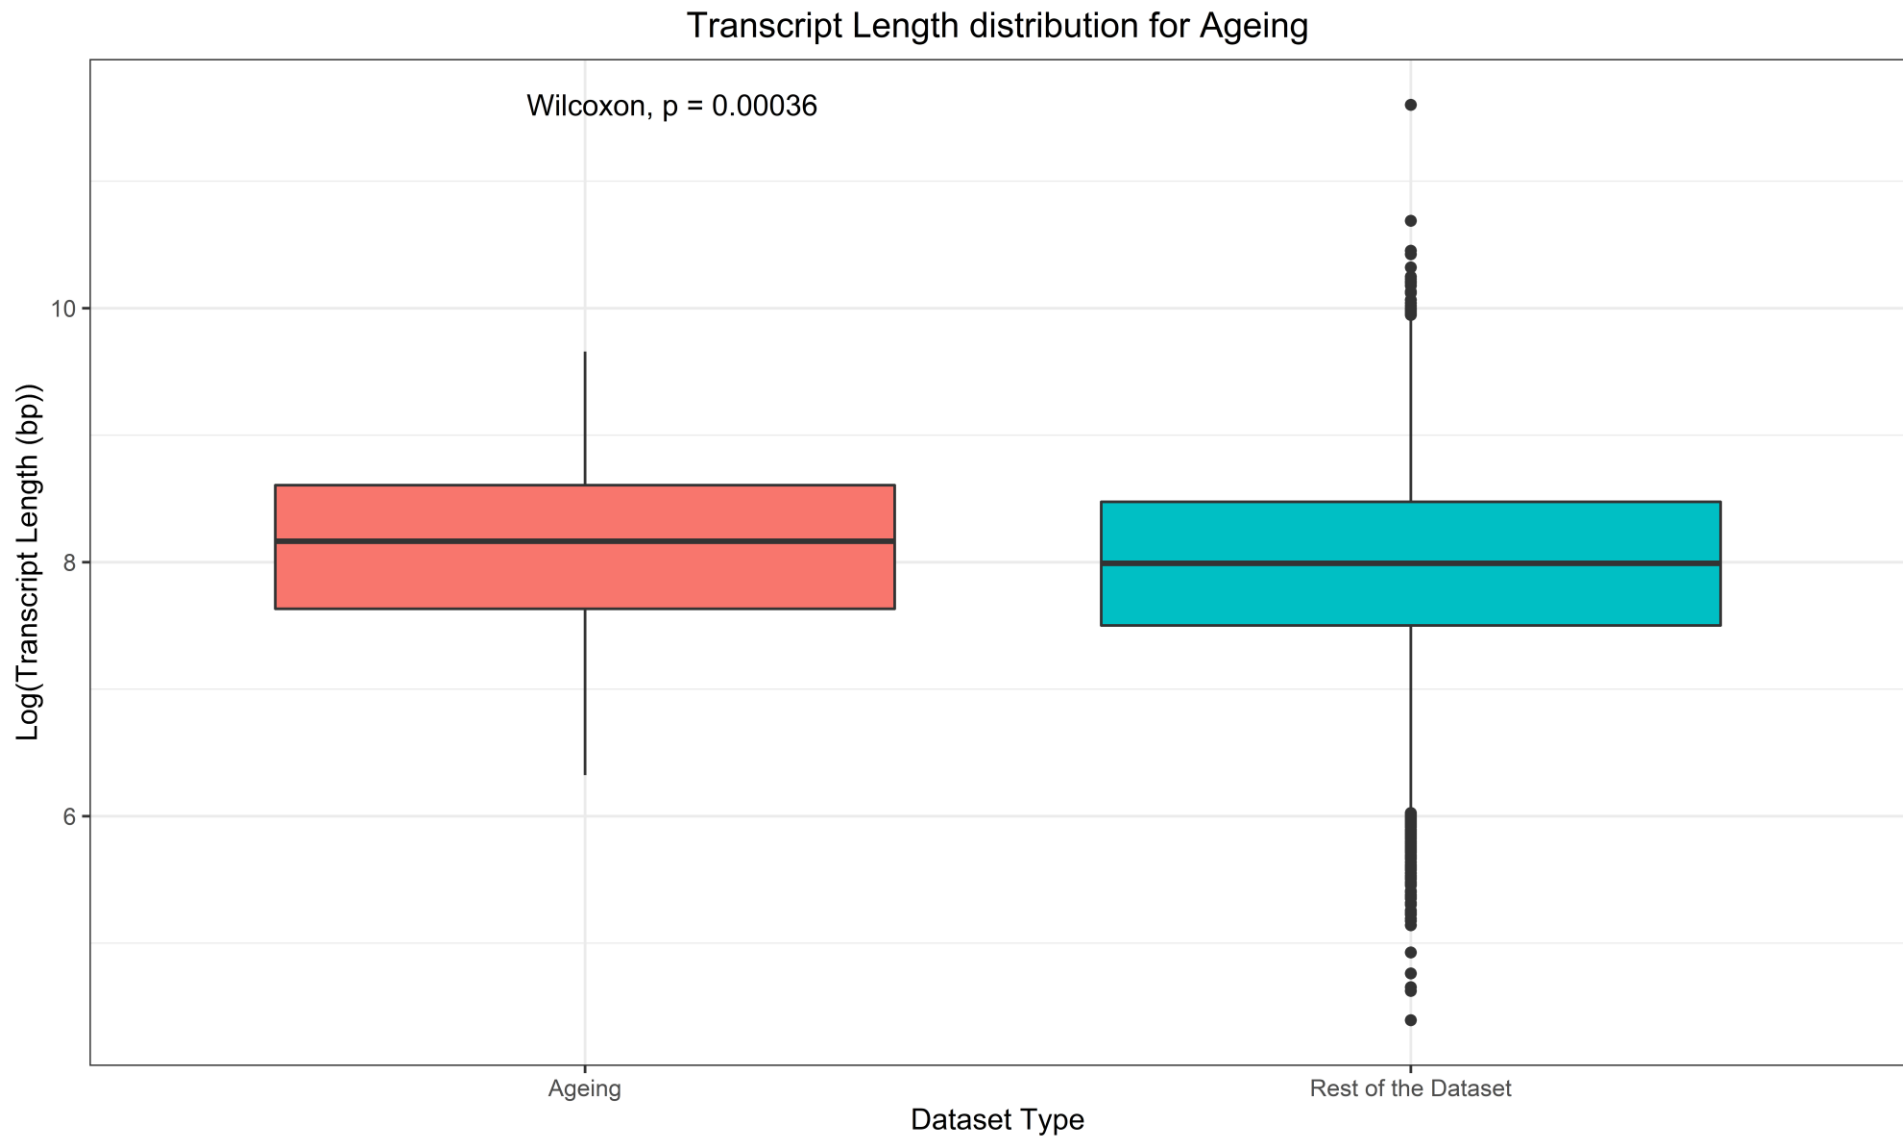

**Supplementary Figure 9B.**

Log transformed Transcript length distribution for Ageing related genes and for the rest of the dataset. Ageing related genes were obtained from GenAge and Transcript Length was obtained from biomart.

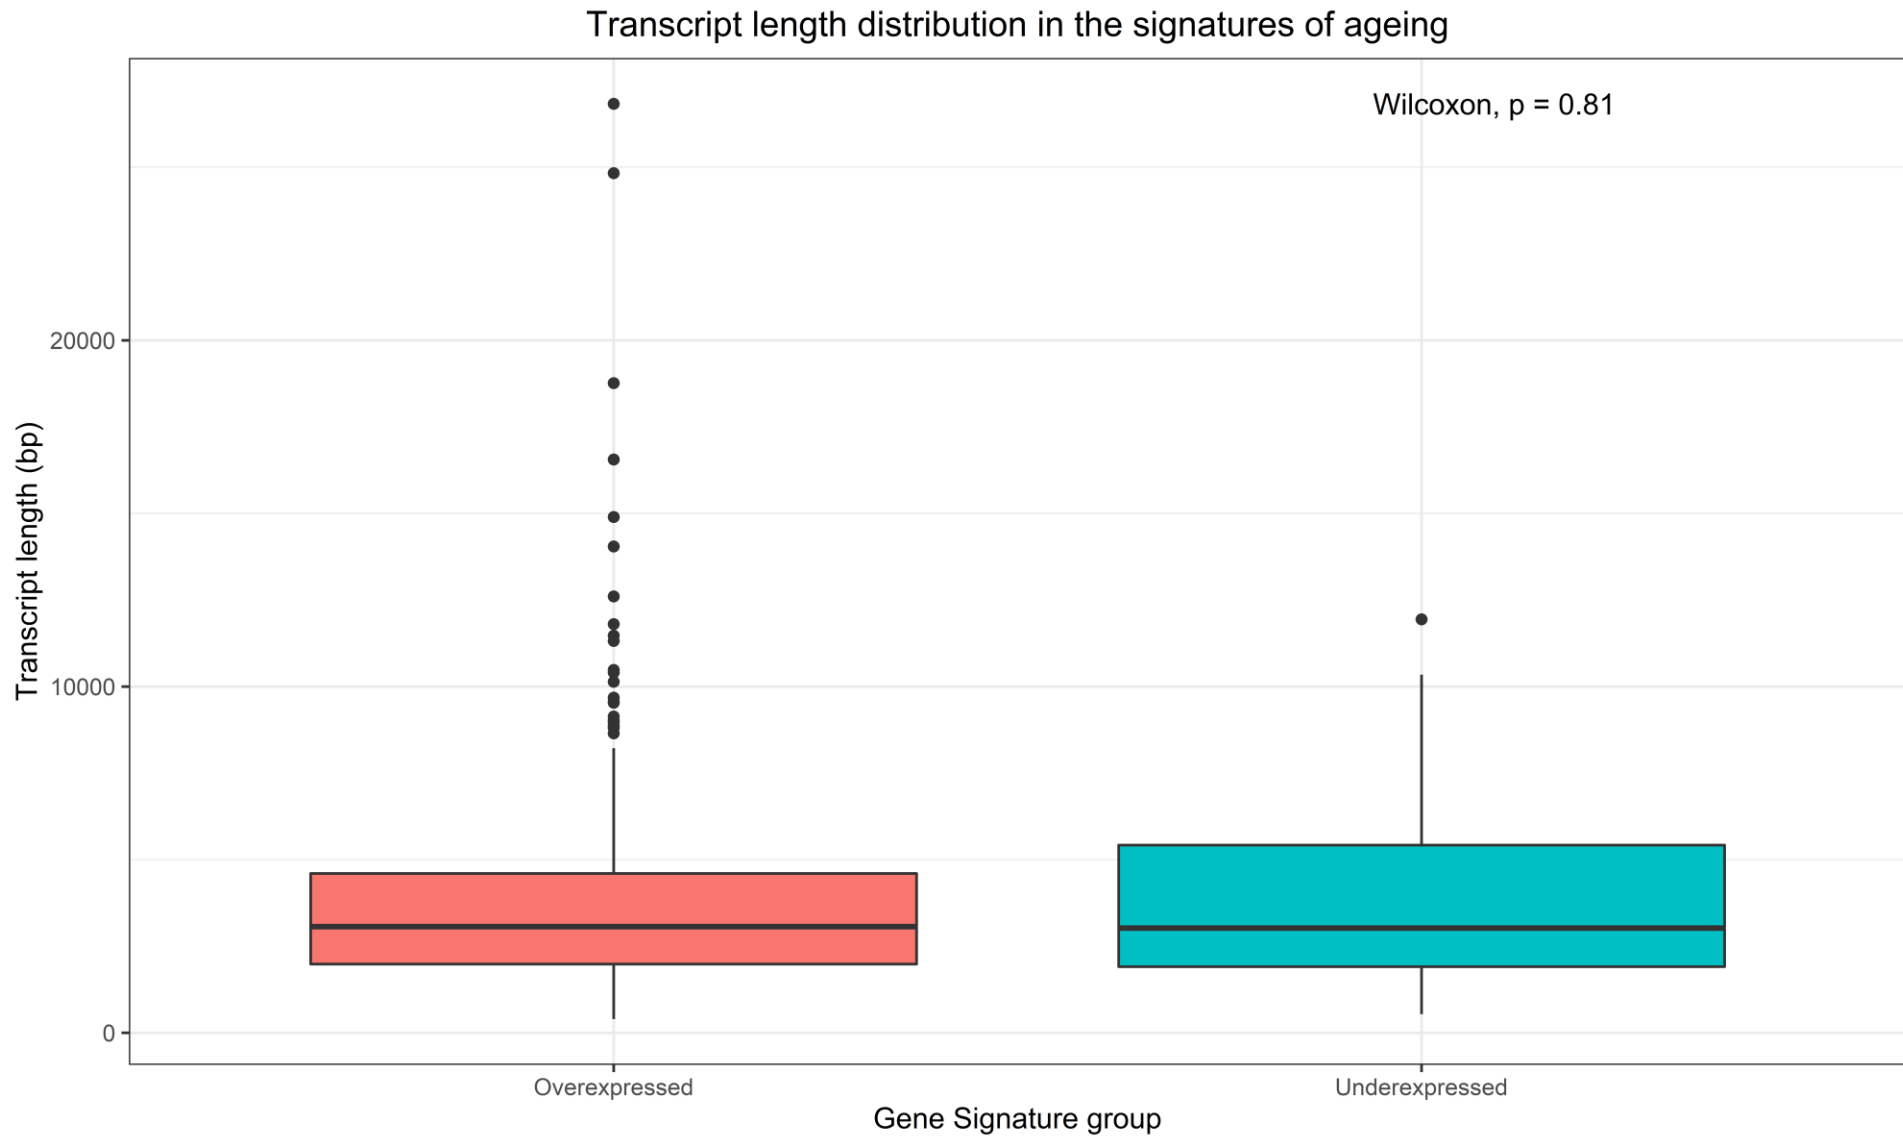

**Supplementary Figure 9C.**

Transcript length distribution for genes overexpressed and underexpressed with age.

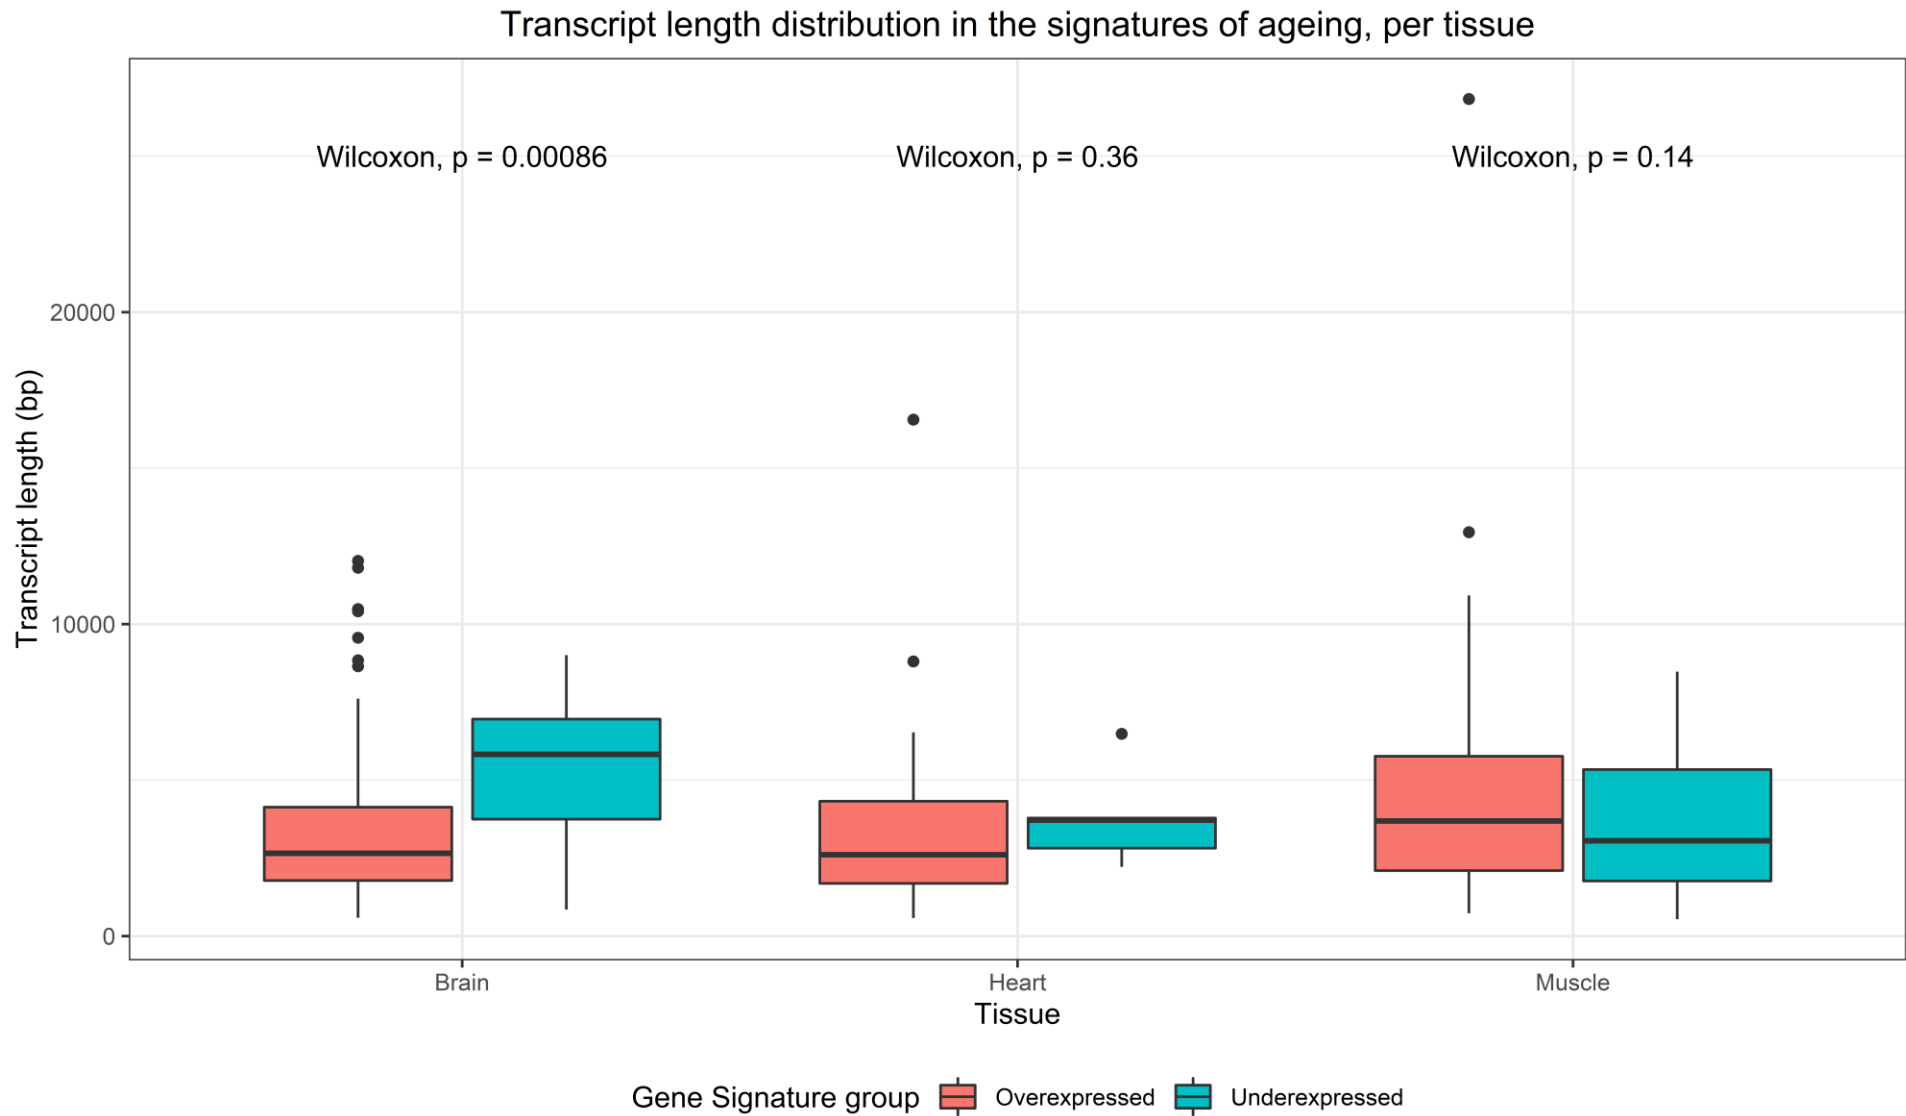

**Supplementary Figure 9D.**

Transcript length distribution for genes overexpressed and underexpressed with age, for brain, heart and muscle.
