# Supplementary material for: Gene Size Matters: An Analysis of Gene Length in the Human Genome
Source: PubMed Central journal article supplement (PMC7905317; doi:10.3389/fgene.2021.559998), 2021-02-11
Supplement: Data_Sheet_10.pdf [file Data_Sheet_10.pdf]

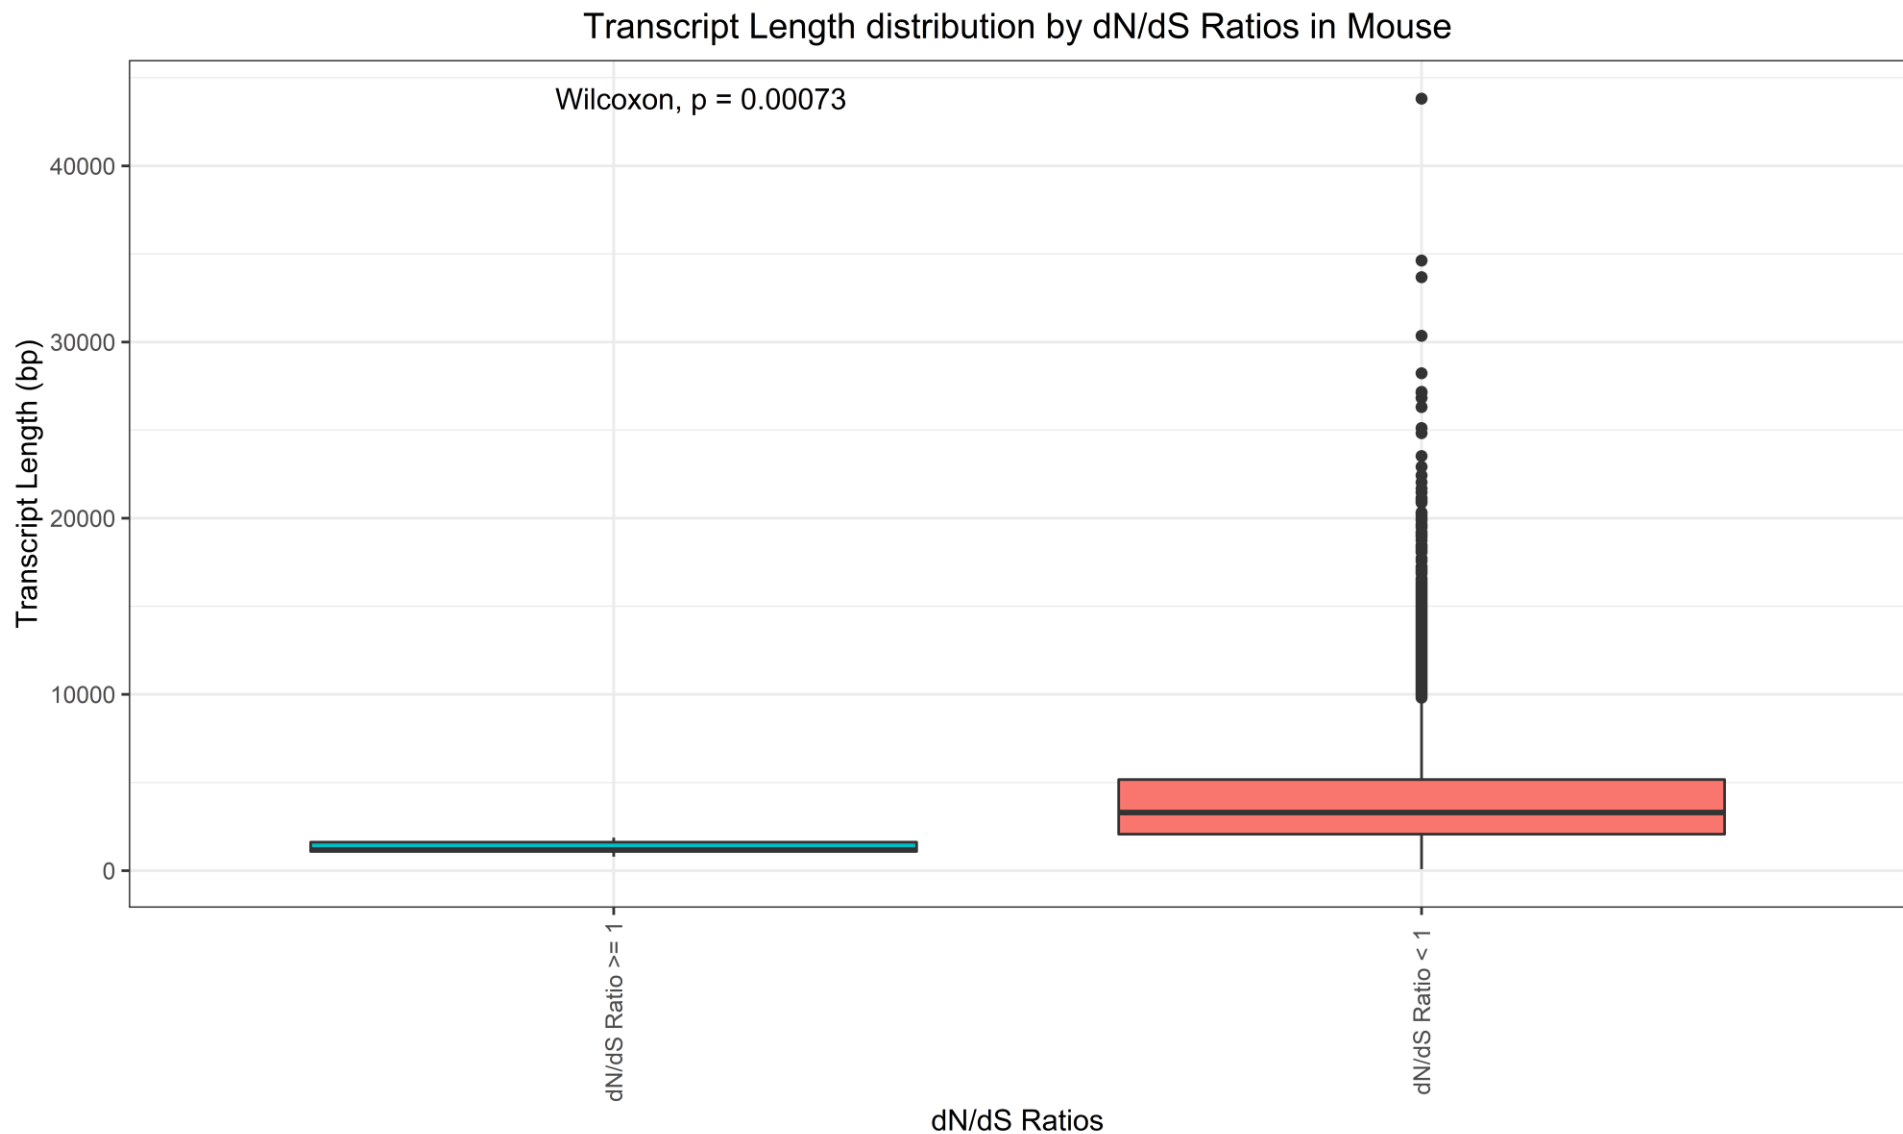

### Supplementary Figure 10A.

Transcript length distribution for different dN/dS ratios in Mouse. dN values, dS values and Transcript Length for each transcript were obtained using biomart.

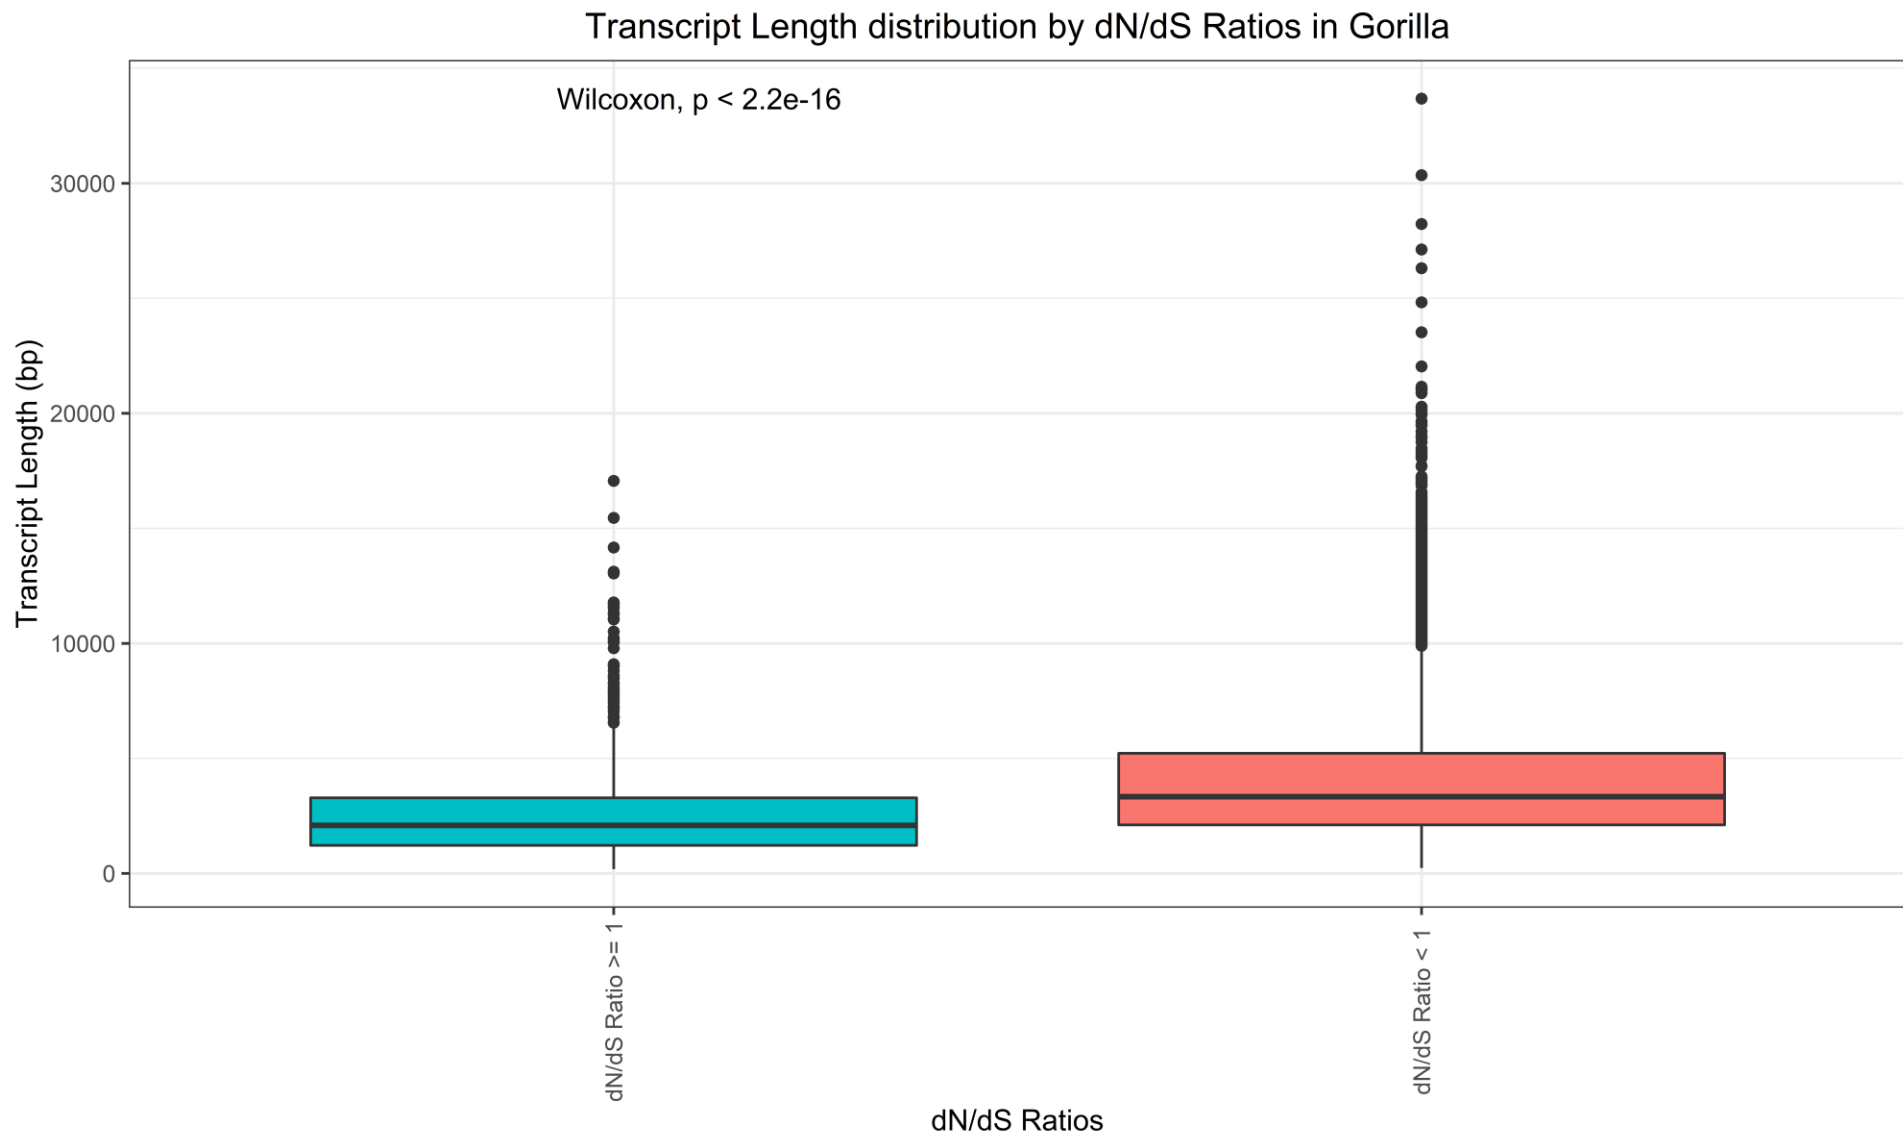

**Supplementary Figure 10B.**

Transcript length distribution for different dN/dS ratios in Gorilla. dN values, dS values and Transcript Length for each transcript were obtained using biomart.

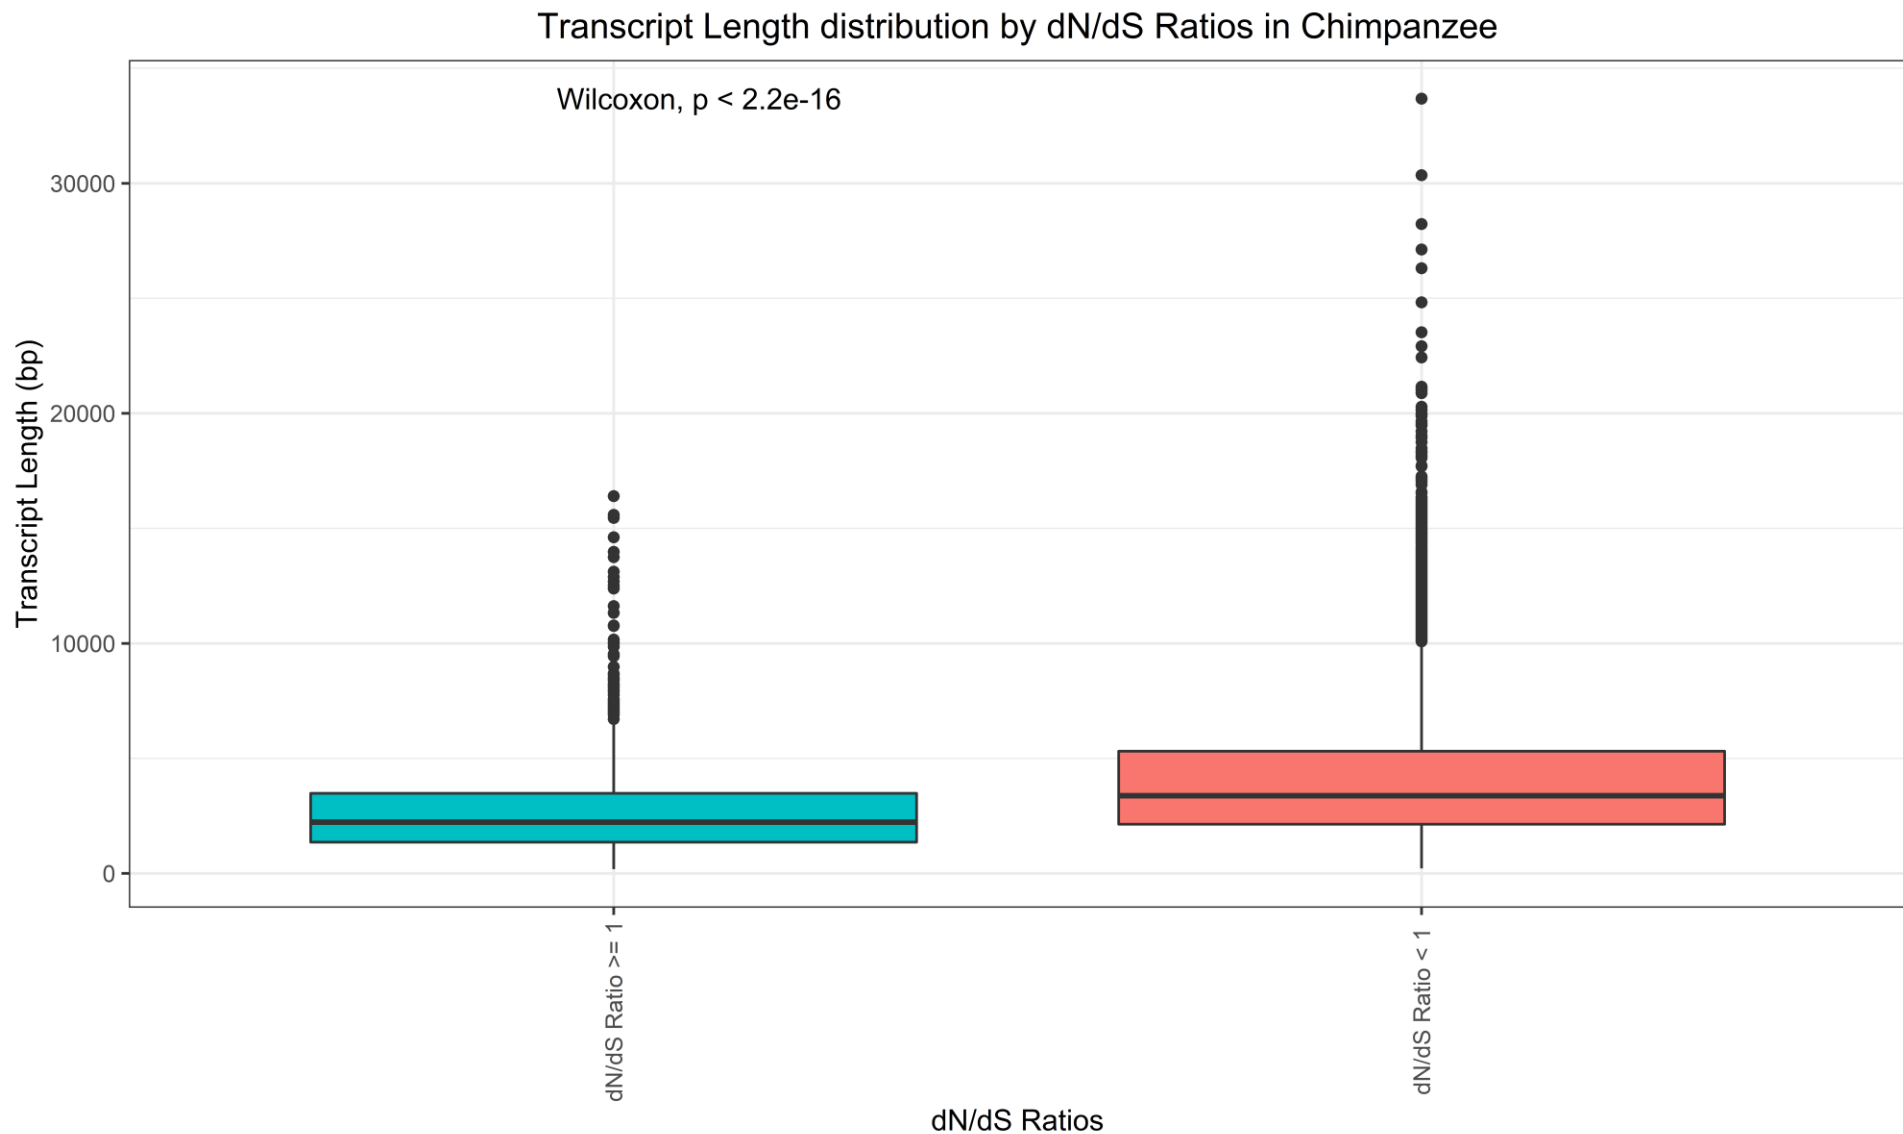

**Supplementary Figure 10C.**

Transcript length distribution for different dN/dS ratios in Chimpanzee. dN values, dS values and Transcript Length for each transcript were obtained using biomart.
